# Supplementary material for: Synaptic memory requires CaMKII
Source: eLife. 2021 Dec 15;10:e60360. doi: 10.7554/eLife.60360 (PMC8798046; doi:10.7554/eLife.60360)
Supplement: Figure 1—source data 1. — In this dataset, the results of the effects of myr-CN27 on AMPAR EPSCs and NMDAR EPSCs are included. [file elife-60360-fig1-data1.xlsx]

## Sheet: AMPA
amap																nmda			con
		6-16-2018-n2						6-14-2018-N2					7-19-2018-n1			8-23-2018-n2	gfp		8-23-2018-n1	gfp no change			8-24-2018-n1			8-24-2018n2
	1	59.0656	66.8679		95.9664	98.7372		89.0911	93.135	93.2331			58.9264						127.522	133.032			110.394	119.276		45.7364	55.0214
	2	82.5765	100.41		100.515	102.635		97.1595	95.4852	93.5411			74.3748						118.04	76.204			-8.76482	111.437		26.3626	62.9717
	3	108.303	103.342		108.88	104.344		104.382	107.536	118.304			103.908						120.932	178.33			61.2082	142.713		-58.1702	75.6556
	4	115.023	113.034		102.447	105.091		103.236	95.9285	98.6821			114.363						89.8949	212.612			120.63	133.411		8.92845	68.4168
	5	120.105	111.61		98.6177	102.552		93.3222	96.0067	106.057			99.262						-46.4034	186.651			107.726	117.501		112.252	79.1784
	6	119.752	109.189		107.67	108.197		97.9754	102.19	107.684			115.417						-127.908	120.646			107.447	104.823		118.615	91.6917
	7	108.068	107.487		105.55	109.267		111.491	106.385	99.4267			110.819						12.0125	77.9863			120.399	98.7002		122.547	99.5268
	8	97.4848	102.917		101.864	108.88		96.2906	98.9632	111.275			120.923						168.277	100.076			120.515	103.813		138.217	109.261
	9	103.492	98.7086		106.237	105.568		107.943	99.3494	115.106			165.148						170.002	67.7334			120.052	102.036		154.358	114.293
	10	105.724	99.8892		102.899	110.221		105.087	98.9583	107.153			162.8						157.413	91.3273			114.701	94.3407		133.224	105.539
	11	109.582	99.8816		97.2009	103.53		105.585	83.3627	105.841			168.456						117.476	90.3917			109.496	88.8017		124.581	108.581
	12	122.644	88.6435		86.3185	99.0763		113.854	96.2349	100.345			162.832						172.984	67.0209			100.609	92.7341		111.235	109.65
	13	117.026	89.186		79.2574	94.804		110.304	84.0277	101.676			161.492						143.216	75.2676			100.058	89.3101		106.136	92.4552
	14	108.194	90.6154		81.181	90.5202		112.9	85.7292	97.4486			199.837						106.945	40.5211			113.198	93.113		120.711	103.583
	15	99.5352	77.6531		75.2787	91.6996		104.413	80.3541	96.9023			210.223						127.837	34.4243			96.0734	90.6632		90.9242	109.495
	16	89.1793	68.3436		77.9211	87.0593		110.121	81.966	86.568			192.306						104.53	52.1136			101.357	79.333		117.93	114.732
	17	88.3777	81.7896		69.4325	84.474		106.667	73.1455	94.524			175.498						116.178	71.7979			109.585	87.8427		94.1382	117.679
	18	70.4178	74.0202		77.9502	95.1408		101.867	73.1977	76.1259			162.777						41.749	59.338			105.723	80.6599		104.901	117.381
	19	66.8502	70.6603		80.5344	92.9893		105.687	82.1371	89.5691			147.746						51.4612	64.8647			91.1959	87.6388		120.171	124.57
	20	70.1461	70.3083		76.7612	94.1894		105.031	75.0964	75.8371			142.605						91.7602	152.865			96.384	76.5319		104.907	106.857
	21	50.5387	64.4668		75.1584	88.571		96.4574	60.0989	82.4604			157.124						122.37	125.628			97.2612	90.5599		124.05	115.989
	22	51.6327	58.8722		70.4192	85.3626		96.2961	69.366	84.0453			142.114						162.324	150.622			99.6465	76.5112		119.566	107.316
	23	44.577	61.2205		71.7787	84.9294		83.9916	59.5073	67.6235			148.541						166.914	65.5029			116.635	75.8071		131.227	98.7225
	24	33.8862	63.7895		71.2682	83.768		78.2191	68.939	74.9063			146.45						185.573	69.5488			121.568	90.163		117.155	127.728
	25	41.1092	61.8071		66.0297	80.6674		71.8445	65.0014	68.6048			129.076						195.525	90.0448			122.973	67.6736		110.109	101.834
	26	36.028	57.9506		70.3821	84.3746		76.1328	58.7185	68.7909			116.471						236.256	113.645			119.969	24.891		122.226	108.763
	27	34.8167	53.2802		70.631	85.3986		65.1008	61.3832	70.181			116.489						216.259	78.57			127.883	69.254		111.878	107.03
	28	36.8162	50.8678		65.0629	91.4356		67.063	57.5157	64.1979			104.202						279.771	86.1228			123.665	252.858		106.035	112.228
	29	34.35	48.8877		67.7189	86.0299		69.3741	55.9364	63.5211			93.122						268.159	81.86			116.752	227.348		103.462	107.878
	30	30.6891	48.3806		67.4982	83.8639		69.4092	56.4743	62.9314			105.137						262.083	86.16			114.259	226.661		129.648	113.375
	31	30.0368	46.7524		66.101	82.2198		65.0774	53.0077	62.6704			89.8449						273.421	57.8076			112.914	222.808		116.219	106.482
	32	36.8541	44.7421		71.9573	83.262		58.74	50.9557	53.4789			64.6708						265.311	65.0568			110.912	215.453		122.754	112.864
	33	36.5741	42.5247		80.9666	86.5571		53.3082	51.963	64.3294			64.8389						150.87	96.5381			97.3146	234.556		94.2259	99.543
	34	31.6926	42.3387		79.4116	88.5791		48.2811	52.2873	57.4389			74.7877						197.817	74.8834			97.2903	232.152		110.561	105.269
	35	32.673	40.5543		80.51	86.4454		50.4633	47.4044	53.2112			74.7543						228.556	31.2892			108.686	214.121		123.647	107.353
	36	36.1408	40.5641		75.8178	78.254		52.3192	50.9443	58.2705			73.0158						175.749	71.5934			114.785	213.683		120.39	117.409
	37	31.0716	38.4036		75.8321	84.8173		44.4197	37.0177	47.9692			61.0358						173.75	72.7768			107.385	202.084		131.681	105.681
	38	34.8582	38.7074		73.5559	82.7414		46.8404	44.7902	54.8918			65.9849						179.17	73.5761			115.145	209.612		126.382	112.123
	39	29.0712	35.247		71.5393	81.6972		40.881	44.5637	45.5179			73.5533						210.108	101.668			110.307	194.05		114.989	102.486
	40	24.4798	35.1351		69.3065	80.8166		35.5602	37.5392	43.8581			59.1872						219.364	153.893			104.134	213.983		111.368	97.3283
	41	27.3904	33.99		70.0533	80.6468		33.8629	38.3362	50.438			58.5251						169.674	93.0436			109.945	220.451		108.328	101.397
	42	29.0499	31.5618		70.3589	84.3908		37.3333	39.9627	44.2705			43.6721						145.326	72.4237			106.443	215.663		133.928	98.3771
	43	28.4373	31.2233		71.2028	82.0181		38.1823	35.6861	36.6572			51.852						195.39	88.6259			101.59	216.713		120.015	93.8426
	44	27.9531	26.6546		71.0576	81.3984		37.3236	30.5083	39.5383			40.0734						149.063	63.0121			100.223	212.965		119.951	103.735
	45	28.5861	26.5974		72.8769	81.0341		34.9801	32.9024	44.2913			48.8124						160.096	87.2256			93.3398	206.81		121.734	86.9895
	46	30.7418	24.7855		73.9575	87.6907		34.3829	39.8128	36.9147			46.5161						146.326	107.232			107.766	222.997		116.158	91.8396
	47	22.2446	24.5193		70.9919	83.3945		30.5587	40.4875	33.2124			47.3013						199.167	76.1412			95.8477	207.24		117.608	79.9461
	48	24.6008	25.1536		75.1741	83.8594		23.9737	27.1688	38.096			49.2413						177.018	63.2104			107.951	184.518		109.657	86.2322
	49	35.4274	23.6523		68.5117	78.0889		22.915	29.2908	41.165			50.9219						202.486	110.344			101.168	184.745		105.878	101.366
	50	25.4574	21.5622		69.8489	78.2823		26.0013	41.6887	37.6958			49.3586						-18.8455	-357.1			90.9703	202.291		105.108	99.855
	51	24.477	20.469		70.2063	78.2859		24.1544	38.8349	28.7551			34.8954						24.1841	-288.27			96.6157	172.073		110.326	79.8844
	52	30.0534	21.1048		70.5027	80.012		28.3883	38.0901	39.801			46.9841						30.3119	-61.1812			98.068	142.981		110.074	86.8076
	53	31.9846	21.4542		72.0817	84.1459		28.3827	32.0126	42.3341			38.416						12.0277	100.243			99.0957	130.752		106.792	77.8824
	54	29.6459	20.2318		65.7751	81.3833		18.9308	27.8843	38.952			51.442						26.9322	117.146			104.361	125.352		109.521	82.0651
	55	26.2742	20.2363		61.4396	83.3312		22.8557	33.7516	38.042			36.2442						29.2243	118.298			89.4621	120.013		103.599	86.9341
	56	25.1395	19.3874		71.43	84.1441		20.4384	30.5653	32.7357			28.1629						27.8911	96.1353			99.8224	110.174		88.0001	88.9727
	57	38.1024	19.4996		67.8523	41.8546		19.6515	27.3611	30.5314			37.1743						15.7289	71.6926			91.6679	127.74		101.369	74.8895
	58	27.2416	19.0858		64.181	10.2154		17.1294	23.9124	37.0121			43.4418						29.5635	101.656			95.7349	117.439		94.0208	70.5364
	59	33.4593	17.5461		55.9003	10.4572		19.6025	27.3986	28.4437			39.2331						19.6114	89.0039			95.491	116.688		93.2448	86.4637
	60	24.1591	16.0038		57.2384	11.0324		24.7675	27.3253	26.6848									21.6814	104.921			89.8103	108.673		109.483	84.4784
	61	23.2924	15.6284		56.9105	8.20352		19.3984	32.0582	31.798									36.1417	97.6781			92.4857	108.475		87.3564	76.6773
	62	24.3338	14.6752		55.1607	7.65684		18.6729	28.973	24.4509									31.1013	95.336			85.1828	101.54		89.0125	61.3954
	63	26.2271	15.0754		46.0697	8.00489		16.6252	29.8889	35.0879									34.3992	74.0036			91.7249	95.7999		98.5623	60.2467
	64	25.3262	14.5766		46.7977	9.04229		17.1866	32.4021	31.6814									30.3528	40.4529			87.1508	96.8787		85.8475	71.6182
	65	26.5597	13.7472		44.862	12.8901		16.1321	36.6151	31.6449									47.1636	86.3148			88.3896	95.3024		98.4374	60.7406
	66	24.7274	13.1084		53.3779	13.3425		18.1535	40.3914	31.8467									17.0388	94.3323			31.9763	24.4956		102.998	60.0758
	67	20.5056	11.9892		53.3975	15.7846		15.2811	45.6638	39.333									51.7595	124.705			-38.175	-58.6335		105.768	65.8682
	68	26.8166	11.4625		58.8118	15.9374		15.6038	52.8414	37.4192									17.5533	71.2217			-12.677	-36.526		94.2348	63.7872
	69	19.7147	12.2124		51.6973	14.0188		15.9624	46.2261	50.4902									29.5518	98.3658			101.822	73.5102		103.481	58.3957
	70	24.3134	12.0886		56.1911	15.7125		11.1892	48.058	52.905													96.2517	44.7942		97.9201	67.9883
	71	21.8796	11.5231		62.509	16.0242		13.2127	52.447	51.722													86.9846	60.1353		95.4196	61.7465
	72	32.2461	11.2935		63.3805	20.5283		12.9107	48.7767	48.4425													80.8708	47.8848		98.7184	60.9517
	73	19.6361	9.8343		71.5973	23.1107		18.1184	44.2344	57.8634													69.4622	12.7218		83.5388	66.2685
	74	22.3139	9.19055		65.7722	22.8692		18.7701	42.484	50.1405													63.1458	21.8225		85.6988	61.3776
	75	19.6675	9.73379		66.5946	19.4262		14.3948	39.1315	54.3473													66.543	48.7473		93.2492	61.492
	76	20.4428	8.61607		71.7811	18.5131		17.1535	36.1425	48.1241													56.15	28.5699		95.7898	55.7922
	77	23.6888	9.4793		67.5811	16.0738		15.6797	39.4493	38.9572													50.82	40.6662		24.4098	72.0911
	78	26.3361	8.48996		70.939	17.138		16.7473	49.0277	39.1259													42.2226	39.9703		-69.5248	66.2329
	79	25.8242	9.12053		74.2195	18.5104		15.8955	38.2824	39.62													34.7669	49.7173		-42.098	59.2886
	80	25.6643	8.92439		72.1515	18.3192		18.7501	51.8016	46.1564													33.0355	67.8954		107.77	64.6662
	81	24.5047	10.236		75.9324	18.0572		18.3563	48.7099	47.9484													32.9894	47.8007		102.995	33.516
	82	27.9383	10.3711		73.5387	18.8002		20.4777	50.444	54.7857													34.4672	84.6516		87.6953	29.1393
	83	26.5006	9.85275		77.6481	18.1062		23.2461	51.4251	48.9783													31.4777	81.3117		91.1769	25.2691
	84	27.626	10.9648		71.3481	19.9657		18.3308	56.3064	54.4847													28.2527	92.2601		85.8743	18.87
	85	31.3941	12.0178		69.8578	17.5849		16.799	55.4459	53.373													37.4459	96.6941		27.9867	5.5004
	86	32.843	11.8879		71.6798	17.1647		18.6294	59.8577	56.9987													35.5373	105.901		13.5029	-0.158944
	87	33.6099	12.7918		73.353	17.7541		20.6577	59.9555	63.3454													34.6286	98.2125		19.4962	3.4333
	88	31.9264	12.2188		72.1399	18.5425		19.6977	57.6542	58.9507													35.2098	104.778		86.9089	24.9618
	89	29.8889	11.3093		76.0388	16.6045		17.2128	60.6759	64.9947													34.4187	116.121		80.2148	18.2126
	90	29.1747	12.7617		71.0549	14.2464		18.9473	59.0999	59.3578													37.4895	111.078		89.946	20.6959
	91	28.3504	14.1452		73.1995	20.0522		16.2128	52.4698	67.9176													24.7839	126.368		81.1558	13.8689
	92	25.316	13.5726		67.9604	20.4623		18.2101	68.8216	61.042													14.2914	115.755		88.0744	14.4693
	93	29.7808	14.0495		72.6202	20.172		19.746	65.373	59.4118													2.63284	117.124		84.4709	19.6346
	94	30.1874	15.3785		70.0675	20.4596		17.3984	60.6775	70.3359													-0.947573	118.565		-24.8445	19.4746
	95	28.3698	15.1168		68.6653	18.8445		17.068	55.2568	68.6605													1.88358	18.3147		-41.4609	24.3378
	96	32.4854	15.4232		71.1603	18.0969		20.8632	63.8361	67.1381													1.04646	11.8595		-62.9255	20.3438
	97	31.6427	14.8059		64.6149	21.3473		19.4439	72.0535	62.7034													3.43846	99.301
	98	31.9051	15.4936		59.2903	19.577		20.7936	67.451	62.7556													2.54646	42.2997
	99	30.1883	14.0571		53.3972	18.2497		18.8894	65.624	70.9065
	100	28.7561	14.9301		42.1222	20.2349		19.066	78.1767	77.4359
	101	31.2685	16.1829		33.0594	18.0895		19.7694	70.4612	70.8073
	102	41.0066	14.7166		Inf	Inf		16.6376	66.7746	80.0665
	103	34.9978	16.9705					15.381	57.0512	75.543
	104	32.9511	17.4497					0.453806	51.5718	70.823
	105	29.7854	17.333					0.0131055	60.4477	64.4554
	106	38.1218	16.7766					-0.673134	54.8559	59.3561
	107	29.0176	15.8663					-0.909009	61.6391	61.4734
	108	23.5946	16.5669					-0.137928	64.7602	64.8521
	109	31.9726	16.655					0.93313	69.4296	61.2681
	110	30.4008	16.9656					0.18897	60.9807	62.5121
	111	22.0339	16.2906					-0.317244	52.9343	75.4125
	112	40.0234	15.1812					-0.322765	56.6698	66.7276
	113	27.6048	15.6935					1.01037	57.2321	58.5384
	114	27.3978	15.2252					0.649696	60.5977	61.4299
	115	30.5477	15.7741					1.41933	58.5213	58.7959
	116	27.6972	15.1718					-0.437237	55.1883	66.3605
	117	34.3925	16.0267					1.70736	62.6861	59.4588
	118	27.3396	13.6674							64.4293
	119	22.4248	15.2606							54.2377
	120	26.9422	12.3321							62.8461
	121	24.5509	13.4081
	122	23.1095	16.7141

## Sheet: NMDA
NMDA
		6-25-2018-N2				6-28-2018-n1-chan 2				7-19-2018-n2
	1	167.042		123.678			123.294			75.6696
	2	116.645		105.534			109.59			53.2811
	3	95.9263		90.9234			106.43			87.7728
	4	113.377		86.4473			102.783			120.152
	5	81.8013		92.3018			95.2533			139.046
	6	66.5678		87.9816			89.7063			118.402
	7	85.0811		72.627			88.8857			115.587
	8	67.2878		77.1322			86.8177			90.0755
	9	98.3261		94.9498			96.3541			111.548
	10	96.4977		86.1425			94.0199			96.8433
	11	123.628		73.4903			88.0267			93.7337
	12	166.128		78.9676			91.1045			105.206
	13	176.848		73.3307			80.8815			106.734
	14	97.5833		58.2191			82.5962			100.905
	15	90.978		83.393			85.3357			85.7873
	16	99.2861		54.6135			80.8212			85.0484
	17	157.294		67.5197			76.6081			85.2932
	18	164.288		68.1363			83.693			98.1262
	19	175.442		72.8229			71.1079			82.3558
	20	178.105		73.5919			76.65			84.6268
	21	183.19		63.2176			76.6098			81.209
	22	164.837		53.9461			70.5028			71.3043
	23	191.224		65.307			78.7465			70.3433
	24	162.608		59.6411			71.7921			76.1274
	25	140.964		67.3891			63.3173			57.7823
	26	118.714		63.827			64.4158			69.5183
	27	145.558		68.1001			63.1131			51.3364
	28	137.044		70.6392			64.6854			75.7149
	29	132.347		54.911			63.435			56.4224
	30	159.523		64.2841			66.438			56.3862
	31	124.45		55.0561			65.3084			47.914
	32	143.204		60.7728			63.0528			47.6148
	33	142.449		64.11			67.6309			47.9684
	34	124.873		56.2531			62.2122			43.7617
	35	145.592		56.6449			54.7237			50.3119
	36	139.101		62.7533			53.2685			64.8538
	37	127.193		40.5031			59.9231			41.6448
	38	159.134		51.1966			58.6571			56.6446
	39	122.713		38.109			55.9126			61.1413
	40	128.347		61.9843			56.9826			53.544
	41	99.8346		36.1285			58.3004			41.119
	42	111.583		40.3145			50.6562			46.0056
	43	97.4348		45.3202			55.9578			51.758
	44	95.3663		47.2065			52.0042			28.6079
	45	126.507		42.5852			56.8637			34.0701
	46	108.451		58.6036			52.0076			49.913
	47	93.3435		40.4958			49.8575			38.2722
	48	70.4419		49.8399			52.8267			53.6256
	49	112.611		52.1107			54.8898			35.2442
	50	69.2648		52.7128			46.7194			53.2539
	51	96.4062		44.0724			53.8311			57.0616
	52	95.7891		50.0213			49.6247			50.5386
	53	77.9844		45.7918			48.0255			54.2874
	54	73.3789		32.9437			49.7654			30.2216
	55	93.0579		52.7636			51.2791			51.1052
	56	74.876		38.5733			52.7494			32.5924
	57	94.692		45.4218			48.5547			40.2849
	58	77.6301		40.7062			52.7728			46.3047
	59	90.7951		36.5928			55.0033			36.7537
	60	113.4		33.7925			52.7527			28.0095
	61	82.6813		-66.2327			55.9075			35.5524
	62	74.236		-67.8171			47.9217			24.7321
	63	94.8978		#NAME?			52.6989			18.1955
	64	-53.1229					52.2688			23.7167
	65	-208.594					42.2966			53.6709
	66	-204.126					49.7369			11.396
							43.9548			34.6884
							43.9028
							45.924
							39.8387
							43.2247
							42.58
							38.0353
							39.1857
							38.5427
							44.6698
							40.1485
							40.3043
							35.5469
							42.1546
							42.4661
							42.1931
							36.8229
							45.0047
							47.3524
							44.7049
							40.5102
							41.0143
							34.6611
							38.1257
							40.4165
							38.6214
							37.2901
							37.2734
							53.7725

## Sheet: after LTP
		first NMDA-then no effect on AMPA OF drug
		6-25-2018-n1-1
					6-27-2018-N4
					65.8452	1
					89.7057	2
					122.395	3
					27.675	4
					9.69493	5
					29.299	6
					216.816	7
					266.671	8
					288.329	9
					298.92	10
					295.994	11
					332.094	12
					320.726	13
					329.299	14
					323.786	15
					335.088	16
					339.891	17
					340.81	18
					312.428	19
					307.446	20
					319.95	21
					318.893	22
					301.157	23
					321.447	24
					312.445	25
					323.315	26
					310.062	27
					317.584	28
					284.901	29
					300.327	30
					300.143	31
					302.675	32
					293.976	33
					314.434	34
					307.284	35
					302.115	36
					-115.117	37	nmda
					-129.02	38
					-141.134	39
					-151.02	40
					-140.101	41
					-145.745	42
					-140.733	43
					-136.119	44
					-134.499	45
					-139.762	46
					-136.508	47
					-132.266	48
					-140.197	49
					-132.354	50
					-126.07	51
					-126.873	52
					-126.918	53
					-123.074	54
					-126.604	55
					-125.904	56
					-120.825	57
					-108.125	58
					-108.095	59
					-110.377	60
					-110.634	61
					-96.8345	62
					-106.144	63
					-95.8731	64
					-83.3447	65
					-85.6591	66
					-82.7031	67
					-77.8506	68
					-73.839	69
					-71.8484	70
					-60.7563	71
					-62.2907	72
					-58.0662	73
					-57.0056	74
					-52.6604	75
					-46.5179	76
					-50.3981	77
					-43.0282	78
					-44.8089	79
					-40.9081	80
					-43.3745	81
					-41.6429	82
					-38.9616	83
					-32.4237	84
					-34.1641	85
					-30.7932	86
					-38.3131	87
					-35.7329	88
					-34.1897	89
					-30.4508	90
					-30.749	91
					-29.2381	92
					-25.4679	93
					-30.3056	94
					-31.217	95
					-26.4067	96
					-26.1644	97
					-25.7337	98
					-26.0222	99
					-28.3581	100
					-24.0453	101
					-24.8331	102
					-22.3078	103
					-23.1711	104
					-24.5976	105
					-22.1714	106
					-23.181	107
					-19.8149	108
					-19.6569	109
					-23.3703	110
					-23.9256	111
					-22.3343	112
					-19.1281	113
					-19.8355	114
					-23.9315	115
					-21.6083	116
					-20.43	117
					-17.4387	118
					-20.1798	119
					-14.9605	120
					-11.8648	121
					28.7093	122
					31.2474	123
					33.2674	124
					10.5589	125
					-18.1961	126
					-18.9182	127
					-19.7845	128

## Sheet: summary
			6-16-2018-n2			6-14-2018-N2				9-11-2018-n2				10-25-2018-N2
		1	59.0656	66.8679		89.0911	93.135	93.2331		107.891	51.934			37.6838
		2	82.5765	100.41		97.1595	95.4852	93.5411		120.404	47.6248			6.16973
		3	108.303	103.342		104.382	107.536	118.304		107.129	56.1427			-27.0123
		4	115.023	113.034		103.236	95.9285	98.6821		104.492	65.6351			82.2254
		5	120.105	111.61		93.3222	96.0067	106.057		99.7262	88.419			93.5078
		6	119.752	109.189		97.9754	102.19	107.684		93.8095	109.536			115.955
		7	108.068	107.487		111.491	106.385	99.4267		94.7976	123.869			102.705
		8	97.4848	102.917		96.2906	98.9632	111.275		94.8709	113.977			110.159
		9	103.492	98.7086		107.943	99.3494	115.106		97.0388	110.15			107.338
		10	105.724	99.8892		105.087	98.9583	107.153		99.5511	107.713			111.964
		11	109.582	99.8816		105.585	83.3627	105.841		92.9894	129.093			122.115
		12	122.644	88.6435		113.854	96.2349	100.345		93.7953	113.77			126.57
		13	117.026	89.186		110.304	84.0277	101.676		84.2611	107.614			109.37
		14	108.194	90.6154		112.9	85.7292	97.4486		83.7262	118.832			141.213
		15	99.5352	77.6531		104.413	80.3541	96.9023		82.6754	111.527			122.319
		16	89.1793	68.3436		110.121	81.966	86.568		90.1837	102.509			126.954
		17	88.3777	81.7896		106.667	73.1455	94.524		99.9735	118.658			135.7
		18	70.4178	74.0202		101.867	73.1977	76.1259		100.547	114.174			123.717
		19	66.8502	70.6603		105.687	82.1371	89.5691		84.7592	109.952			118.04
		20	70.1461	70.3083		105.031	75.0964	75.8371		102.688	106.53			114.984
		21	50.5387	64.4668		96.4574	60.0989	82.4604		110.968	87.9103			123.761
		22	51.6327	58.8722		96.2961	69.366	84.0453		106.573	82.555			129.987
		23	44.577	61.2205		83.9916	59.5073	67.6235		99.0122	102.806			118.61
		24	33.8862	63.7895		78.2191	68.939	74.9063		97.0376	87.8654			123.775
		25	41.1092	61.8071		71.8445	65.0014	68.6048		113.946	78.0749			124.843
		26	36.028	57.9506		76.1328	58.7185	68.7909		108.184	71.7527			114.033
		27	34.8167	53.2802		65.1008	61.3832	70.181		94.7633	63.8361			101.909
		28	36.8162	50.8678		67.063	57.5157	64.1979		91.9315	58.3871			99.6335
		29	34.35	48.8877		69.3741	55.9364	63.5211		87.3271	48.5283			122.638
		30	30.6891	48.3806		69.4092	56.4743	62.9314		97.2021	60.3975			123.851
		31	30.0368	46.7524		65.0774	53.0077	62.6704		86.7366	62.9592			131.232
		32	36.8541	44.7421		58.74	50.9557	53.4789		72.6312	57.433			132.347
		33	36.5741	42.5247		53.3082	51.963	64.3294		76.1753	52.7287			144.118
		34	31.6926	42.3387		48.2811	52.2873	57.4389		57.7885	52.2419			130.097
		35	32.673	40.5543		50.4633	47.4044	53.2112		61.5542	52.4272			142.065
		36	36.1408	40.5641		52.3192	50.9443	58.2705		69.564	49.273			130.295
		37	31.0716	38.4036		44.4197	37.0177	47.9692		69.6409	51.2797			138.193
		38	34.8582	38.7074		46.8404	44.7902	54.8918		67.7629	53.4539			123.262
		39	29.0712	35.247		40.881	44.5637	45.5179		68.112	50.4407			123.394
		40	24.4798	35.1351		35.5602	37.5392	43.8581		49.7134	52.5466			119.387
		41	27.3904	33.99		33.8629	38.3362	50.438		71.8916	44.7129			114.5
		42	29.0499	31.5618		37.3333	39.9627	44.2705		58.9506	45.0214			117.44
		43	28.4373	31.2233		38.1823	35.6861	36.6572		50.9263	44.4815			113.359
		44	27.9531	26.6546		37.3236	30.5083	39.5383		67.5322	46.8662			114.845
		45	28.5861	26.5974		34.9801	32.9024	44.2913		59.9955	51.7374			113.37
		46	30.7418	24.7855		34.3829	39.8128	36.9147		56.1827	53.8642			111.337
		47	22.2446	24.5193		30.5587	40.4875	33.2124		59.5067	46.3699			100.533
		48	24.6008	25.1536		23.9737	27.1688	38.096		64.7466	47.2379			113.655
		49	35.4274	23.6523		22.915	29.2908	41.165		67.8481	61.2649			99.9466
		50	25.4574	21.5622		26.0013	41.6887	37.6958		61.7575	56.2578			89.3761
		51	24.477	20.469		24.1544	38.8349	28.7551		61.7953	57.3028			93.7738
		52	30.0534	21.1048		28.3883	38.0901	39.801		54.3095	52.0329			89.6397
		53	31.9846	21.4542		28.3827	32.0126	42.3341		62.3184	56.0235			91.5332
		54	29.6459	20.2318		18.9308	27.8843	38.952		56.3094	61.9989			82.0814
		55	26.2742	20.2363		22.8557	33.7516	38.042		53.1983	52.9443			82.0961
		56	25.1395	19.3874		20.4384	30.5653	32.7357		43.0204	50.4483			82.9164
		57	38.1024	19.4996		19.6515	27.3611	30.5314		59.6014	45.847			84.8253
		58	27.2416	19.0858		17.1294	23.9124	37.0121		43.9162	51.5085			84.496
		59	33.4593	17.5461		19.6025	27.3986	28.4437		52.428	49.5228			78.5891
		60	24.1591	16.0038		24.7675	27.3253	26.6848		39.0669	43.6058			76.9987
		61	23.2924	15.6284		19.3984	32.0582	31.798						77.8438
		62	24.3338	14.6752		18.6729	28.973	24.4509						69.4049
		63	26.2271	15.0754		16.6252	29.8889	35.0879						73.0796
		64	25.3262	14.5766		17.1866	32.4021	31.6814						64.7768
		65	26.5597	13.7472		16.1321	36.6151	31.6449						65.4889
		66	24.7274	13.1084		18.1535	40.3914	31.8467						60.9342
		67	20.5056	11.9892		15.2811	45.6638	39.333						62.6127
		68	26.8166	11.4625		15.6038	52.8414	37.4192						65.0118
		69	19.7147	12.2124		15.9624	46.2261	50.4902						17.6872
		70	24.3134	12.0886		11.1892	48.058	52.905						-39.4144
		71	21.8796	11.5231		13.2127	52.447	51.722						54.9895
		72	32.2461	11.2935		12.9107	48.7767	48.4425						61.2535
		73	19.6361	9.8343		18.1184	44.2344	57.8634						55.3235
		74	22.3139	9.19055		18.7701	42.484	50.1405						47.432
		75	19.6675	9.73379		14.3948	39.1315	54.3473						33.5408
		76	20.4428	8.61607		17.1535	36.1425	48.1241						40.4651
		77	23.6888	9.4793		15.6797	39.4493	38.9572						31.546
		78	26.3361	8.48996		16.7473	49.0277	39.1259						31.5592
		79	25.8242	9.12053		15.8955	38.2824	39.62						24.0225
		80	25.6643	8.92439		18.7501	51.8016	46.1564						25.3098
		81	24.5047	10.236		18.3563	48.7099	47.9484						29.9209
		82	27.9383	10.3711		20.4777	50.444	54.7857						27.5728
		83	26.5006	9.85275		23.2461	51.4251	48.9783						28.356
		84	27.626	10.9648		18.3308	56.3064	54.4847						28.99
		85	31.3941	12.0178		16.799	55.4459	53.373						38.1665
		86	32.843	11.8879		18.6294	59.8577	56.9987						35.7064
		87	33.6099	12.7918		20.6577	59.9555	63.3454						30.9097
		88	31.9264	12.2188		19.6977	57.6542	58.9507						34.5853
		89	29.8889	11.3093		17.2128	60.6759	64.9947						31.5723
		90	29.1747	12.7617		18.9473	59.0999	59.3578						31.7525
		91	28.3504	14.1452		16.2128	52.4698	67.9176						32.4236
		92	25.316	13.5726		18.2101	68.8216	61.042						38.2237
		93	29.7808	14.0495		19.746	65.373	59.4118			--			45.4767
		94	30.1874	15.3785		17.3984	60.6775	70.3359						45.6421
		95	28.3698	15.1168		17.068	55.2568	68.6605						52.82
		96	32.4854	15.4232		20.8632	63.8361	67.1381						45.9174
		97	31.6427	14.8059		19.4439	72.0535	62.7034						56.2304
		98	31.9051	15.4936		20.7936	67.451	62.7556						51.7005
		99	30.1883	14.0571		18.8894	65.624	70.9065						46.1083
		100	28.7561	14.9301		19.066	78.1767	77.4359						36.2205
		101	31.2685	16.1829		19.7694	70.4612	70.8073						41.389
		102	41.0066	14.7166		16.6376	66.7746	80.0665						39.6054
		103	34.9978	16.9705		15.381	57.0512	75.543						44.852
		104	32.9511	17.4497		0.453806	51.5718	70.823						44.351
		105	29.7854	17.333		0.0131055	60.4477	64.4554						36.9991
		106	38.1218	16.7766		-0.673134	54.8559	59.3561						34.5227
		107	29.0176	15.8663		-0.909009	61.6391	61.4734						32.8264
		108	23.5946	16.5669		-0.137928	64.7602	64.8521						32.957
		109	31.9726	16.655		0.93313	69.4296	61.2681						32.2396
		110	30.4008	16.9656		0.18897	60.9807	62.5121						33.9049
		111	22.0339	16.2906		-0.317244	52.9343	75.4125						36.1463
		112	40.0234	15.1812		-0.322765	56.6698	66.7276						40.7063
		113	27.6048	15.6935		1.01037	57.2321	58.5384						34.2845
		114	27.3978	15.2252		0.649696	60.5977	61.4299						33.0877
		115	30.5477	15.7741		1.41933	58.5213	58.7959						33.6266
		116	27.6972	15.1718		-0.437237	55.1883	66.3605						39.9517
		117	34.3925	16.0267		1.70736	62.6861	59.4588						40.6677
		118	27.3396	13.6674				64.4293						39.2381
		119	22.4248	15.2606				54.2377						49.3958
		120	26.9422	12.3321				62.8461						44.0123
		121	24.5509	13.4081										38.6753
		122	23.1095	16.7141										35.6716
														35.7249
														37.0547
														35.9151
														36.8066
														34.7438
														31.945
														33.2276
														32.0254
														33.0204
														28.271
														25.7474
														27.8311
														28.2416
														23.9908
														30.4026
														22.31
														28.5926
														23.4597
														23.4844
														21.9629
														25.7389
														25.0214
														24.4362
														21.0467
														23.5958
														24.7864
														26.6976
														22.9533
														23.2069
														25.4768
														22.0958
														19.8151
														24.4663
														22.8674
														20.5418
														23.8231
														20.6694
														26.1069
														20.8959
														21.6265
														20.7776
														21.3358
														21.0482
														24.4972
														20.0161
														17.8675
														21.0792
														24.8815
														18.3925
														24.8026
														24.0991
														20.79
														20.4374
														19.4586
														22.7391
														18.4064
														20.2264
														19.938
														20.3099
														22.1098
														20.1073
														22.1159
														21.5508
														22.3943
														23.295
														19.7184
														22.9811
														21.7139
														16.9709
														-7.19493

## Sheet: NMDA SUMMARY
		Before	after		ratio
	9-3-2018-n2	85	80		0.941176
	8-24-2018-n1	19	16		0.842105
	8-24-2018-n2	22	21		0.954545
	10-25-2018N1	23	24	0.401788	1.04348
	10-25-2018-N1	67	69		1.02985
	8-3-2018-n1
								MEAN		SE	P	N
							BEFO	43.2	30.6464	13.7055	0.401	5
							AFTER	42	30.0583	13.4425
							ratio	0.96223	0.08079	0.03613
