# Supplementary material for: Synaptic memory requires CaMKII
Source: eLife. 2021 Dec 15;10:e60360. doi: 10.7554/eLife.60360 (PMC8798046; doi:10.7554/eLife.60360)
Supplement: Figure 2—source data 1. — In this dataset, the results of the effects of AIP on AMPAR EPSCs and NMDAR EPSCs are included. [file elife-60360-fig2-data1.xlsx]

## Sheet: con
																	mean	se
		90.4892	107.923	87.3362	102.111	87.5492	99.8525									1	95.8769	3.5171
		105.345	91.9924	77.3315	125.093	83.3939	106.09									2	98.2076	7.14093
		92.8114	90.573	72.2844	116.872	85.554	101.612									3	93.2845	6.14833
		98.2912	93.4165	80.2883	90.8585	26.0597	105.809									4	82.4539	11.7928
		96.8679	87.1781	69.3308	111.175	97.6275	99.5444									5	93.6206	5.77739
		105.719	84.5876	73.5727	78.7292	57.0241	101.495									6	83.5213	7.39588
		93.4761	74.2099	93.082	78.0541	78.4982	91.6172									7	84.8229	3.59494
		98.7923	93.058	77.1449	87.0825	34.6985	97.3356									8	81.352	9.87211
		88.3655	85.2615	86.0821	75.2144	81.7465	95.6242									9	85.3824	2.77432
		96.5988	78.0771	95.2952	107.863	46.062	99.8912									10	87.2979	9.16042
		78.7912	87.2739	88.3762	104.989	68.1846	84.4537									11	85.3448	4.95655
		88.0041	76.0497	112.259	73.6348	48.2681	82.1021									12	80.053	8.5091
		76.3014	74.0776	123.983	80.2034	64.3327	92.4156									13	85.219	8.60133
		90.9996	64.9674	97.6496	87.1273	70.6482	84.0994									14	82.5819	5.07786
		95.0638	76.6264	95.4474	87.2194	55.5756	85.7836									15	82.6194	6.1043
		86.7615	74.8667	99.5986	87.5311	34.6232	83.0049									16	77.731	9.2197
		83.2464	66.0846	109.842	88.4799	62.7014	89.6968									17	83.3418	7.0543
		73.2393	73.9556	112.892	76.0875	23.7328	83.0595									18	73.8278	11.7278
		66.3315	43.7302	118.397	65.2161	12.9035	72.5805									19	63.1931	14.2096
		65.0874	38.0844	101.634	56.8203	27.4615	69.8211									20	59.8181	10.6532
		66.7744	35.0389	104.964	43.6321	56.2809	68.663									21	62.5589	10.0137
		82.2458	39.2153	87.8628	59.1075	4.50313	73.3766									22	57.7185	12.8214
		64.9967	33.9254	93.5642	62.9041	38.9721	69.2472									23	60.6016	8.87948
		75.0108	37.5861	87.6106	53.3996	40.1983	59.8757									24	58.9468	7.9981
		64.4173	31.953	94.5323	51.5995	19.4681	53									25	52.495	10.6819
		52.6534	24.0024	88.8199	50.4631	-6.15415	54.1911									26	43.996	13.0954
		61.9942	26.3721	82.7526	63.1661	-1.64923	54.4942									27	47.855	12.3941
		54.1542	25.1013	99.86	62.7663	3.00806	51.6833									28	49.4289	13.5343
		55.7807	27.314	89.9847	60.699	-5.81534	48.1029									29	46.011	13.2725
		54.7569	27.6938	93.8406	62.1231	4.64439	63.5066									30	51.0942	12.6775
		39.8214	27.9911	93.9093	55.4386	16.2091	52.1247									31	47.5824	11.0406
		35.2786	22.914	94.3745	58.0636	29.9049	51.1517									32	48.6146	10.6115
		39.007	26.7115	78.5295	46.2022	32.5598	43.2446									33	44.3758	7.4197
		39.7826	32.4123	76.6734	66.7166	-4.58918	62.074									34	45.5116	12.1237
		47.1713	24.361	75.3895	57.0441	23.6719	41.7835									35	44.9036	8.09206
		45.7084	20.394	62.9884	56.2645	38.8932	49.0419									36	45.5484	6.07798
		53.8882	19.1819	65.2347	53.473	26.3913										37	43.6338	8.8424
		57.9866	21.1119	39.5606	64.9146	23.1395										38	41.3426	8.87826
		39.536	19.7569	22.4217	63.7686	32.7445										39	35.6455	7.87965
		39.0373	10.8536	26.2036	70.0924	27.6718										40	34.7717	9.90365
		41.0741	21.7019	30.5251	66.3377	14.1655										41	34.7609	9.08185
		48.5201	23.4095	28.3783	77.2941											42	44.4005	12.2348
		64.9982		26.1673												43	45.5827	19.4154
		50.3536		39.6999												44	45.0267	5.32685
		48.413		38.414												45	43.4135	4.9995
		50.2001		41.7398												46	45.9699	4.23015
		39.5942

## Sheet: crispr
																MEAN	SE
															1	107.145	17.5373
			175.05	92.3065	82.0029	80.9799	105.384								2	105.588	19.7031
			182.217	89.4889	101.977	77.3843	76.8734								3	93.4067	19.6413
			171.742	75.3036	71.3232	78.5856	70.0793								4	102.2	26.8797
			209.378	69.5066	82.2679	77.069	72.7797								5	108.593	21.208
			189.63	100.465	102.672	68.6215	81.5785								6	115.54	26.4832
			213.104	91.1947	128.762	73.8711	70.7666								7	118.647	30.2374
			227.777	133.505	100.316	54.9081	76.728								8	126.332	33.1178
			248.273	140.318	98.2718	60.8785	83.9166								9	123.702	30.3587
			230.925	147.181	96.5881	59.9752	83.8427								10	125.655	38.6746
			261.598	161.219	83.0044	56.3229	66.1302								11	110.585	30.4715
			223.05	120.051	86.0415	46.2775	77.5033								12	109.145	26.4931
			207.915	115.279	78.5866	55.4317	88.5149								13	127.936	41.9637
			288.018	130.246	96.6413	59.6504	65.1259								14	111.93	30.7007
			228.196	114.213	92.9833	60.1136	64.1417								15	123.87	40.0689
			279.979	117.878	75.6053	63.2444	82.6455								16	113.843	26.6292
			219.132	101.475	86.0422	76.2611	86.3061								17	98.323	32.377
			226.806	73.4716	73.5374	51.2438	66.5561								18	103.987	33.241
			234.791	71.9435	73.6145	51.0597	88.5253								19	103.211	26.8194
			197.084	129.926	64.2079	64.7243	60.1139								20	116.501	33.7067
			242.756	129.743	77.896	69.7373	62.3716								21	129.235	35.8162
			269.135	110.344	84.4256	111.338	70.9342								22	126.488	30.1018
			243.849	119.889	88.3515	100.504	79.8446								23	119.557	38.4906
			271.896	88.1689	94.0156	82.6747	61.029								24	120.952	32.7201
			247.55	116.924	95.2613	75.3538	69.6727								25	132.771	43.1494
			288.391	158.777	98.5158	71.5629	46.61								26	131.49	37.6691
			264.558	158.386	108.925	63.2345	62.3475								27	119.093	39.987
			271.268	114.03	100.64	45.2923	64.2365								28	135.237	41.7007
			292.238	141.887	107.028	59.8561	75.1749								29	126.788	34.9266
			244.841	153.233	118.704	44.5899	72.57								30	132.974	39.1861
			278.101	120.94	137.21	58.99	69.6277								31	131.548	33.496
			235.506	176.201	120.966	62.2089	62.8561								32	154.007	46.99
			286.117	144.674	119.256	65.9791									33	132.788	39.1435
			241.561	114.513	120.145	54.9343									34	132.681	38.4788
			237.77	115.106	124.879	52.9692									35	136.984	39.5739
			240.614	124.189	134.953	48.1802									36	97.4692	23.9883
				125.245	117.459	49.7036									37	101.985	30.2004
				140.125	123.476	42.3541									38	72.2489	30.1761
				102.425		42.0729									39	70.2108	27.7361
				97.9469		42.4747									40	99.1872	59.5138
				158.701		39.6734									41	89.2952	42.0168
				131.312		47.2784									42	85.8575	36.0416
				121.899		49.8159
				111.675
				132.449
				129.367
				123.113
				137.399
				118.467
				118.477
				81.9092
				101.465
				118.29
				125.098
