# Supplementary material for: Synaptic memory requires CaMKII
Source: eLife. 2021 Dec 15;10:e60360. doi: 10.7554/eLife.60360 (PMC8798046; doi:10.7554/eLife.60360)
Supplement: Figure 3—source data 1. — In this dataset, the results of the effects of paAIP2 on AMPAR EPSCs and NMDAR EPSCs are included. [file elife-60360-fig3-data1.xlsx]

## Sheet: Sheet1
											8-3-2018-n3			8-30-2018-n2
		7-31-2018-n3		7-31-2018-n2		7-31-2018-n1		8-1-2018-n2			con	gfp		con	gfp
	1	53.735		112.969		128.326		241.791	20s		49.7353	106.859		79.1841	167.311
	2	112.5		184.101		120.166		208.424			54.5595	89.8679		3.48848	144.046
	3	109.696		79.7756		96.365		136.64			54.321	64.9403		92.0385	122.108
	4	121.178		71.4867		91.5018		-24.5078			58.0474	60.1544		114.288	97.8831
	5	116.47		76.0391		93.7115		-51.9643			67.5758	51.025		121.5	72.1441
	6	103.248		110.191		86.5031		-35.6929			93.751	22.7959		105.297	103.214
	7	100.194		98.1908		89.2683		-47.4625			112.877	51.2022		106.524	95.2969
	8	104.878		83.4758		83.0286		119.056			139.428	84.3999		104.173	99.7256
	9	109.165		78.2453		109.021		117.978			160.344	70.0175		106.557	118.107
	10	116.528		91.3306		103.054		89.5699			148.673	91.1796		101.654	80.5488
	11	103.858		94.4725		105.575		93.8663			144.71	87.2072		111.891	97.4339
	12	90.3801		91.4052		107.38		95.2234			135.93	105.577		111.458	101.911
	13	85.4309		118.692		93.778		111.9			133.732	110.237		104.43	78.6844
	14	78.5902		93.8125		81.7447		93.6413			101.74	111.13		113.313	97.8192
	15	100.408		106.909		56.4543		100.537			92.2373	126.807		102.635	106.215
	16	94.1152		104.599		69.4608		81.6334			108.947	131.266		109.563	92.6333
	17	85.9677		123.871		44.2269		79.913			77.9169	176.151		106.148	78.6609
	18	85.684		56.0348		54.3955		91.5364			68.8932	131.23		101.282	71.3162
	19	70.5382		124		52.9274		82.4937			78.9762	158.228		103.114	76.5256
	20	79.9983		66.9366		41.5079		76.4511			84.8319	151.514		106.817	90.6479
	21	58.8285		76.0098		42.0412		80.8506			75.3959	132.883		97.6539	61.2996
	22	66.4009		116.387		33.3582		199.115			69.6108	136.853		85.5743	97.8444
	23	50.6103		94.3663		40.4133		71.2242			60.9508	123.884		90.9142	69.8927
	24	59.5669		49.9272		42.8724		78.3989			58.2559	100.159		92.6074	87.7033
	25	53.4933		74.7281		33.9708		78.8981			47.2584	99.0284		89.7273	97.1966
	26	53.2955		71.3986		34.27		64.0706			51.4681	98.9954		83.6096	74.1178
	27	48.6911		69.6558		32.3603		85.372			56.4567	93.249		83.4027	74.3382
	28	64.9288		70.8041		20.0011		77.8832			107.914	81.4993		87.836	86.8216
	29	58.4349		57.6419		23.9342		107.412			88.2629	87.1769		81.1653	80.7002
	30	42.2163		56.9186		22.3075		101.711			89.2395	100.331		83.9024	66.0176
	31	43.8173		51.8531		16.7763		87.9292			71.6701	89.2518		81.5278	53.6823
	32	43.5031		34.0684		15.9684		81.9475			67.5837	100.85		80.4175	76.0578
	33	48.3109		55.7364		13.2791		106.671			57.5024	91.1618		84.8421	66.1724
	34	45.747		73.9867		9.29622		126.259			-33.9672	70.4269		73.1577	73.9916
	35	36.5487		57.8273		Inf		108.68			-14.8272	63.6816		72.7514	47.9463
	36	30.3662		60.5194				105.473			72.983	63.9605		77.8901	67.7558
	37	28.2359		34.6923				92.4037			67.7227	56.1434		82.4017	66.6436
	38	43.5241		49.4594				120.802			65.05	52.6533		76.3831	45.3113
	39	43.4047		41.643				121.602			41.7312	48.5132		78.9757	56.1945
	40	46.8952		61.3806				131.062			34.3905	39.1255		73.5925	56.0111
	41	42.2698		57.764				129.304			46.6976	39.2849		80.474	45.3382
	42	42.3309		42.3437				126.221			40.5196	3.18896		74.85	33.2335
	43	35.5412		37.4703				118.747			42.7485	-20.4902		74.268	51.3098
	44	34.5904		49.4955				121.7			40.0725	20.8493		70.1005	34.45
	45	38.1354		26.6815				144.928			42.7153	26.0841		70.7639	25.7458
	46	30.5515		32.4681				126.568			56.1155	22.2807		72.2438	33.501
	47	33.4651		38.0218				153.249			52.5281	18.7081		68.3289	40.6639
	48	34.7098		33.3135				144.769			48.6342	20.5232		67.3817	39.2135
	49	26.802		35.7863				123.833			53.686	19.6685		61.451	39.7334
	50	30.5486		52.8544				151.332			58.6761	12.0012		57.4592	41.8552
	51	40.7996		32.8207				127.328			82.6488	21.1127		69.5578	41.4665
	52	31.8268		21.998				106.837			69.9121	9.88374		64.7993	66.6655
	53	34.2676		26.8578				137.711			67.2962	16.074		64.0818	40.1255
	54	40.7012		40.2596				122.12			36.0381	16.4092		68.5271	49.7652
	55	37.4619		46.4847				115.027			77.3302	19.6246		75.2674	41.978
	56	29.8427		19.7263				124.175			59.2937	8.17301		74.4788	39.3952
	57	29.9783		23.5238				150.197			29.7527	15.8514		78.4216	51.956
	58	37.4648		8.13736				134.578			39.6839	13.2571		34.5266	16.0421
	59	35.2371		27.4184				123.048			43.5146	13.2805		-15.4621	-14.0896
	60	27.4421		36.3175				130.305			41.0582	19.773		95.7201	24.0662
	61	Inf		13.004				129.322			58.645	15.13		86.0049	33.3058
				34.7691				145.699			-26.9093	15.3333		89.476	31.7477
				32.4839				125.654			-19.7267	12.9314		88.9573	45.1868
				16.1346				128.214				12.8847		96.7902	26.9489
				15.574				123.125				20.1893		87.2104	37.3441
				15.0722				130.478				14.1846		79.4373	26.7066
				24.5997				99.7963				10.9404		86.4091	27.1205
				46.6587				124.705				14.4347		89.785	38.9746
				5.31415				129.039				12.5247		71.5669	48.5689
				1.40369				124.541				0.21436		86.0479	41.48
				22.4139				135.557				-8.73583		88.8213	44.6854
								119.202						84.2039	35.6076
								119.567						85.2902	33.1291
								136.298						80.4202	51.675
								146.85						80.4713	34.0613
								159.369						84.1147	45.9978
								129.032						77.8432	43.9215
								130.79						84.6904	51.1971
								123.636						77.2573	44.2294
								142.596						86.8634	46.7654
								129.28						-12.8307	-14.24
								150.764						-13.5953	-14.5399
								143.025						93.5876	40.1675
								144.073						83.3639	30.6876
								138.656						85.2241	29.7403
								129.283						83.4111	41.6146
								111.453						83.0885	40.3089
								105.701						81.165	42.3634
								134.198						86.9602	50.7647
								129.105						87.948	34.6384
								123.636						94.9453	45.5486
								139.976						91.9572	31.8604
								114.132						94.727	35.4629
								112.439						88.0396	39.8966
								115.782						85.6313	35.4091
								122.781						84.4592	23.3312
								117.744						81.3302	28.618
								104.32						94.2138	23.3733
								124.325						78.7274	23.9
								121.009						86.0401	21.6486
								120.474						78.9301	35.081
								115.922						76.3543	25.3184
								111.971						68.4511	25.7879
								121.416						60.6675	36.666
								128.943						60.7642	21.9935
								118.501						59.0599	27.6202
								92.6029						56.6538	34.6048
								119.766						51.3947	28.7038
								115.915						51.5313	36.1074
								109.013						49.4819	28.8384
								119.005						47.1989	15.4767
								116.185						58.5064	18.0074
								123.589
								108.016
								124.982
								106.003
								124.185
								126.425
								123.805
								101.953
								110.48
								121.752
								100.591
								108.328
								89.9801
								118.301
								110.796
								92.9029
								110.89
								97.6587
								129.714
								108.645
								116.515
								118.566
								115.777
								100.335
								99.0979
								91.0536
								116.356
								120.8
								89.8887
								109.676
								92.6873
								93.3037
								96.8454
								80.2294
								69.553
								47.4476
								53.9473
								59.4414
								68.2287
								62.9314
								63.9182
								76.3198
								59.0101
								45.0029
								58.6585
								49.9322
								73.7696
								59.7086
								59.2023
								55.5903
								51.5846
								46.2264
								54.92
								67.4974
								51.1229
								56.9381
								57.8405
								63.7846
								60.3367
								46.7304
								45.4483
								49.5665
								44.4193
								57.8217
								56.0169
								37.5587
								-41.4933
								-27.5619
								-31.2864
								-30.6395
								-28.2487
								-27.6112
								-31.1622
								35.6148
								50.6166
								49.9861
								56.8443
								35.5711
								50.1595
								61.211
								72.368
								81.7905
								70.8562
								58.4147
								63.8315
								82.3999
								76.2261
								61.7361
								61.0774
								78.3426
								57.7631
								50.1619
								38.8783
								54.2449
								40.7605
								46.5569
								77.1402
								48.6969
								46.3038
								44.0794
								47.9984
								56.5748
								65.9434
								46.6437
								66.8129
								58.3046
								62.0736
								63.6651
								63.3182
								48.9923
								71.3859
								63.8971
								72.8813
								81.7155
								62.0736
								76.7441
								64.4362
								62.8471
								59.507
								61.7103
								42.4012
								45.6053
								57.8288
								62.3244
								47.3632
								71.2499
								48.0289
								53.6871
								75.3588
								54.9411
								41.7566
								67.0989
								45.1014
								49.4798
								64.2862
								77.0652
								53.6965
								56.9475
								58.5952
								45.2022
								59.5586
								60.4211
								41.5691
								66.7122
								69.3678
								51.5096
								67.5396
								43.9927
								56.9615
								52.6159
								56.1927
								69.4217
								60.8547
								56.0333
								66.0676
								62.6853
								47.4804
								68.742
								56.0896
								55.0606
								65.6691
								65.1699
								67.9919
								71.9226
								67.1036
								56.5068
								56.1646
								40.5917
								61.5485
								62.8986
								52.5737
								47.9164
								57.7842
								112.024

## Sheet: nmda
					both NMDA
	measure NMDA first			8-3-2018-n1							con	gfp
				con	gfp		8-1-2018-n1 gfp		8-1-2018-n2 gfp		8-1-2018-n3			8-9-2018-N2
	1	287.305		314.038	314.756		487.929		202.676		327.468	181.914		98.4488
	2	313.92		-12.0537	-33.9091		-193.448		59.5814		-64.1394	1.29648		96.8915
	3	261.197		300.134	300.336		202.682		-27.8448		32.1085	58.5182		88.8292
	4	142.653		249.015	207.152		225.896		96.004		128.169	97.7741		78.0316
	5	83.8668		156.57	132.759		214.255		91.3065		70.4889	76.8224		87.029
	6	64.9543		110.655	105.764		126.245		79.6372		77.0878	64.573		85.7736
	7	90.4973		131.198	80.8971		86.3358		75.3565		67.3821	60.2837		84.5845
	8	62.801		91.5371	109.573		56.8873		106.046		72.3102	58.7204		96.6338
	9	49.6931		71.0947	96.7066		64.8854		71.8382		68.306	64.0432		51.5069
	10	39.5593		78.5537	73.6718		42.8906		77.015		79.5261	71.2831		72.8003
	11	47.8426		69.3433	61.7366		40.3162		85.3132		102.704	99.9632		67.0057
	12	36.8005		88.398	71.9664		29.2755		98.4363		112.021	115.297		69.7815
	13	54.834		51.6998	57.2673		39.5886		96.2188		110.333	120.515		84.1538
	14	39.8218		70.0606	55.0786		32.0789		117.161		85.2137	117.204		73.7501
	15	62.4982		40.9315	68.6386		36.9429		108.064		84.1915	123.12		63.3832
	16	70.4451		38.0593	43.0595		32.1603		124.63		92.6124	130.658		71.1363
	17	32.4065		50.769	64.87		40.9878		130.666		108.924	125.633		76.4302
	18	45.0755		44.7778	75.4093		57.9507		113.89		101.71	113.71		72.9586
	19	25.5968		35.5607	65.7963		24.0147		111.949		124.24	125.601		94.8999
	20	104.998		54.3318	72.5234		32.9388		121.379		123.056	139.974		85.3834
	21	140.466		55.4093	50.2296		24.9407		119.813		124.808	121.412		86.4289
	22	47.1428		63.3854	76.5566		69.1338		115.166		113.235	142.639		82.4419
	23	47.2505		56.8637	66.1864		103.283		113.036		113.285	138.551		92.6432
	24	54.1274		47.0228	78.6728		52.9595		114.153		101.418	143.527		95.5405
	25	45.1174		53.8414	76.0814		13.554		110.65		81.8971	141.511		66.4498
	26	64.6313		55.5094	64.7584		53.2393		139.046		95.3344	140.333		99.174
	27	51.1734		41.5386	79.0099		37.3499		115.895		106.717	148.227		112.066
	28	68.7292		59.3623	92.7482		33.7834		132.075		102.393	148.355		91.4467
	29	70.4316		23.4213	53.9751		61.7208		122.185		105.988	141.407		95.684
	30	39.3487		12.513	49.6151		32.1654		106.272		93.4254	139.402		112.438
	31	55.6494		40.7146	47.3217		66.6305		120.47		107.036	132.273		114.18
	32	26.7677		46.6859	72.3312		15.2127		104.415		102.657	144.697		109.581
	33	41.6141		45.455	74.62		56.8161		108.5		104.861	129.61		111.065
	34	-98.0942		38.8265	71.4912		19.3135		108.898		85.6116	128.776		78.7495
	35	-13.9289		28.6554	64.1474		44.4984		103.738		87.6691	138.08		88.3469
	36	49.9622		45.058	73.5567		-66.134		109.297		81.7783	128.565		75.5245
	37	20.0858		48.7442	69.2174		-62.8748		101.018		82.2303	128.671		89.7385
	38	56.57		42.7729	70.4452		50.4461		105.926		87.7939	114.82		104.291
	39	44.7204		24.699	63.3419		17.3852		105.103		79.3941	126.811		100.753
	40	39.7006		40.0575	78.6969		35.8287		111.091		94.1961	116.678		93.2617
	41	68.635		36.0544	75.0124		35.8541		101.994		84.5861	134.605		97.3591
	42	34.627		48.3839	94.9967		22.3662		94.1776		96.5044	131.66		109.725
	43	53.7439		52.4036	84.9176		55.9155		98.6674		82.5715	131.051		106.946
	44	50.6688		30.6035	86.4182		30.054		96.8688		98.8906	125.139		108.378
	45	37.4532		32.5851	96.2843		29.4383		105.934		92.6177	116.087		87.85
	46	59.4769		42.5761	89.8243		43.1501		101.021		92.7859	124.782		107.238
	47	17.6298		52.1001	97.595		33.7681		94.7537		81.6041	118.571		105.368
	48	45.0098		42.8963	101.511		35.849		91.2105		90.7409	117.666		91.8277
	49	21.8488		44.0939	86.9532		25.363		85.3851		81.9769	108.322		92.9524
	50	23.9751		32.2682	88.44		32.9337		55.5297		76.9149	105.283		88.4574
	51	-50.6607		47.0795	103.007		12.3431		57.1085		65.9383	111.838		90.4969
	52			30.5435	83.7623		26.1312		62.5371		66.3923	113.426		78.928
	53			35.6841	88.9002		-18.0186		45.2152		66.4965	101.897		72.8739
	54			45.5517	85.9038				57.2273		83.3647	105.462		63.4807
	55			29.3498	80.6592				49.3124		69.0497	105.891		69.5698
	56			18.3652	83.3527				51.8642		57.6052	94.955		87.4174
	57			32.9453	126.202				52.9281		53.7191	98.5602		76.6897
	58			70.5409	122.142				48.4326		58.8768	104.516		68.701
	59			39.5771	121.361				46.6354		62.0568	101.309		69.8809
	60			19.7992	60.5668				32.2002		76.7143	97.3009		73.185
	61			-4.75566	-28.219				-27.7773		61.2352	93.7714		30.3298
	62			35.9143	106.552				-26.7183		55.9145	104.327		-2.33035
	63			55.5294	99.8239				35.3316		64.9524	99.0345		58.1126
	64			32.3616	110.606				44.6362		55.8928	91.1237		64.922
	65			32.1914	110.528				65.4025		50.2269	88.193		73.6102
	66			27.8514	117.584				58.7763		43.6353	92.9537		63.3151
	67			50.5756	115.142				66.1735		52.7035	92.8954		65.6233
	68			40.8314	76.6475				60.5628		50.124	92.7187		59.595
	69			27.0975	84.3216				43.6064		48.1991	92.0271		73.1463
	70			35.7175	96.4075				49.5314		50.8947	85.2921		65.2386
	71			39.04	124.343				41.2616		40.615	90.9431		79.055
	72			31.4875	119.172				52.2091		38.7501	80.1002
	73			41.3218	106.107				52.8819		37.0911	92.4989
	74			43.4401	103.88				56.871		34.7848	88.9098
	75			43.2499	90.6631				54.6094		30.3979	90.744
	76			23.9751	83.6599				67.5525		41.6451	85.6086
	77			32.3148	108.756				62.1872		35.5259	71.0214
	78			37.719	100.646				49.4909		26.9334	72.7117
	79			38.2027	89.8427				49.4745		31.1449	67.4244
	80			24.5289	96.8344				51.6415		34.2021	84.0033
	81			37.8524	83.3803				55.0098		32.2931	75.7587
	82			30.4434	59.1832				45.7244		35.0791	85.9133
	83			33.0521	75.1366				58.4164		30.1095	94.234
	84			42.4326	65.5006				51.8521		34.3123	75.284
	85			25.2394	69.1092				50.1509		32.3624	74.9448
	86			33.1889	66.0196				53.7182		31.461	69.6316
	87			56.4568	56.5734				50.2647		31.4491	71.1053
	88			50.232	76.1734				49.2861		32.1624	73.0253
	89			55.406	61.7919				56.3518		37.1736	67.001
	90			33.4758	71.8583				53.5461		30.2105	61.8673
	91			41.4485	87.7035				54.7225		35.3048	65.512
	92			35.117	70.4544				60.6361		36.6292	67.3576
	93			44.2007	69.6892				59.6191		32.4237	53.9526
	94			62.0344	77.5669				48.3501		-1.82746	12.3425
	95			53.5479	63.3097				49.8728		-37.8645	-55.8964
	96			42.2625	77.9352				59.1469		-43.7389	-53.2245
	97			41.3084	66.0483						25.1339	30.7069
	98			39.0567	63.2625						46.422	59.0777
	99			76.3054	74.7673						36.618	50.8935
	100			56.2766	74.0722						32.4244	56.9897
	101			59.796	82.9672						35.6242	48.6615
	102			38.3462	74.6522						29.4456	51.6011
	103			48.2137	65.7745						29.6291	42.8452
	104			44.6143	69.8698						23.2064	48.6081
	105			48.5473	69.1932						20.6658	45.6308
	106			61.7909	48.5852						27.8388	47.3214
	107			38.1427	64.5294						24.8733	52.7331
	108			67.3763	27.8241						21.2241	40.7685
	109			-25.8287	-23.5711

## Sheet: summary-gfp
		gfp																				n=4
			7-31-2018-n3		7-31-2018-n2		7-31-2018-n1		8-3-2018-n3		8-30-2018-n2		9-6-2018-N1		10-26-2018-n1-1		10-28-2018-n1		11-20-2018-n1				mean	se			12-17-2018-n1		12-12-2018-n2		12-17-2018-N2
		1	53.735		112.969		128.326		106.859		167.311		159.178		88.3776		96.3055		131.095				87.6942	9.74554			92.9405				73.6379
		2	112.5		184.101		120.166		89.8679		144.046		128.867		111.178		97.7325		94.0377				86.0802	13.374			116.885				74.6511
		3	109.696		79.7756		96.365		64.9403		122.108		124.914		71.1904		94.482		-13.4785				84.3114	13.8412			92.1596				72.8601
		4	121.178		71.4867		91.5018		60.1544		97.8831		123.759		112.07		95.7061		95.169				80.6845	19.9263			106.839				71.4784
		5	116.47		76.0391		93.7115		51.025		72.1441		98.6094		99.6481		85.7132		98.2294				84.7138	11.4201			87.6517				71.8936
		6	103.248		110.191		86.5031		22.7959		103.214		90.3647		100.742		64.8446		114.896				88.9456	5.31848			96.2383				69.3979
		7	100.194		98.1908		89.2683		51.2022		95.2969		88.3981		108.217		98.6109		103.921				91.6122	10.2314			96.3269				68.8689
		8	104.878		83.4758		83.0286		84.3999		99.7256		91.6514		106.709		88.2968		85.9039				100.523	6.0164			99.0382				67.9938
		9	109.165		78.2453		109.021		70.0175		118.107		84.3665		79.8941		88.9261		107.101				97.7782	4.2859			91.4347				69.1012
		10	116.528		91.3306		103.054		91.1796		80.5488		97.4088		108.567		74.7137		120.401				98.6856	4.51912			80.0948				70.7665
		11	103.858		94.4725		105.575		87.2072		97.4339		107.843		96.5484		107.828		117.362				102.034	7.57519			113.488				68.0971
		12	90.3801		91.4052		107.38		105.577		101.911		96.22		113.365		96.2663		115.417				91.3194	7.37328			110.562				57.3828
		13	85.4309		118.692		93.778		110.237		78.6844		66.5022		110.117		87.6605		105.525				97.6446	14.8339			104.711				57.188
		14	78.5902		93.8125		81.7447		111.13		97.8192		75.4979		109.973		109.547		101.588				99.8602	12.7994			88.8416				56.3063
		15	100.408		106.909		56.4543		126.807		106.215		82.307		96.2866		116.284		114.057				107.554	28.0596			89.7765				56.5761
		16	94.1152		104.599		69.4608		131.266		92.6333		108.414		101.721		120.394		138.158				81.8361	17.9658			84.511				49.5029
		17	85.9677		123.871		44.2269		176.151		78.6609		90.2259		113.442		111.157		117.951				101.423	24.225			84.0615				40.5111
		18	85.684		56.0348		54.3955		131.23		71.3162		97.1981		81.7705		108.724		101.423				84.9892	23.5708			94.3343				44.2668
		19	70.5382		124		52.9274		158.228		76.5256		97.1479		89.6911		112.171		102.266				77.4406	19.7388			94.1305				46.6368
		20	79.9983		66.9366		41.5079		151.514		90.6479		97.1571		86.9899		140.955		72.4037				88.2498	23.5309			99.5718				38.6478
		21	58.8285		76.0098		42.0412		132.883		61.2996		89.2298		100.121		97.5389		89.4445				77.3185	19.4386			112.869				39.8972
		22	66.4009		116.387		33.3582		136.853		97.8444		91.996		86.0077		89.9751		59.0798				63.1314	12.808			83.2681				38.3701
		23	50.6103		94.3663		40.4133		123.884		69.8927		93.9852		84.4185		91.8378		47.731				65.3051	13.9863			86.4819				34.2782
		24	59.5669		49.9272		42.8724		100.159		87.7033		91.1421		108.067		58.9406		63.437				64.4899	13.7747			81.4015				27.5498
		25	53.4933		74.7281		33.9708		99.0284		97.1966		90.2455		75.6917		69.4322		64.7447				60.989	13.1867			93.1832				27.7268
		26	53.2955		71.3986		34.27		98.9954		74.1178		73.2908		116.68		82.1992		77.3523				59.3083	13.5439			65.0823				22.7493
		27	48.6911		69.6558		32.3603		93.249		74.3382		70.8403		83.3598		80.5854		64.1288				56.797	12.9303			75.436				14.6416
		28	64.9288		70.8041		20.0011		81.4993		86.8216		73.6015		103.246		71.537		46.6241				55.4434	16.558			75.8233				-12.0277
		29	58.4349		57.6419		23.9342		87.1769		80.7002		57.9518		75.9697		91.8516		43.287				50.4246	14.9596			53.9649				-17.7257
		30	42.2163		56.9186		22.3075		100.331		66.0176		57.8084		92.7561		85.256		60.7917				48.5975	18.3304			59.2241				23.0063
		31	43.8173		51.8531		16.7763		89.2518		53.6823		68.4162		82.1458		83.3749		53.0541				52.1221	15.9699			59.2288				25.566
		32	43.5031		34.0684		15.9684		100.85		76.0578		68.3631		63.5223		73.705		58.0515				49.8642	14.9093			62.5219				25.0719
		33	48.3109		55.7364		13.2791		91.1618		66.1724		62.0583		66.6985		93.5045		37.8229				52.6859	8.24367			55.8937				32.4668
		34	45.747		73.9867		9.29622		70.4269		73.9916		57.7273		89.5591		91.2038		30.2887				51.6154	10.6709			53.6117				26.5661
		35	36.5487		57.8273		Inf		63.6816		47.9463		48.2687		74.7164		111.894		26.3168				39.6905	8.43493			57.625				24.8541
		36	30.3662		60.5194				63.9605		67.7558		54.9945		56.5516		83.0729		36.7404				48.5456	2.67469			43.9176				23.7231
		37	28.2359		34.6923				56.1434		66.6436		49.4646		96.6295		101.004						44.5203	2.0602			45.5151				22.4663
		38	43.5241		49.4594				52.6533		45.3113		39.3512		77.4917		101.423						49.1338	6.52127			39.1794				22.4966
		39	43.4047		41.643				48.5132		56.1945		49.4759		74.8944		43.4649						46.4396	5.72741			40.693				19.6654
		40	46.8952		61.3806				39.1255		56.0111		65.4814		79.5934		77.932						29.2878	13.0495			47.4129				16.3117
		41	42.2698		57.764				39.2849		45.3382		56.993		59.7323		70.6978						17.5071	19.0068			50.4229				15.9373
		42	42.3309		42.3437				3.18896		33.2335		43.2949		50.482		89.1567						34.9784	8.27172			42.8349				15.0866
		43	35.5412		37.4703				-20.4902		51.3098		42.9399		52.4442		71.8321						30.3003	3.92133			42.7152				15.7998
		44	34.5904		49.4955				20.8493		34.45		56.8759		56.4572		59.3855						28.4334	3.12572			47.4814				17.2052
		45	38.1354		26.6815				26.0841		25.7458		66.889		33.4375		55.9506						30.065	5.82882			33.4006				16.2492
		46	30.5515		32.4681				22.2807		33.501		63.1188		33.1674		57.6196						29.5155	4.51418			46.4174				18.3264
		47	33.4651		38.0218				18.7081		40.6639		61.1647		47.4031		62.4217						27.4189	4.66302			47.1842				14.1378
		48	34.7098		33.3135				20.5232		39.2135		64.9909		57.9647		55.9252						31.8014	11.8099			50.4275				16.3156
		49	26.802		35.7863				19.6685		39.7334		72.8417		42.1073		64.6117						31.5777	5.717			51.4838				14.7819
		50	30.5486		52.8544				12.0012		41.8552		89.4657		42.6795		42.3767						21.2362	6.34586			52.3984				13.3772
		51	40.7996		32.8207				21.1127		41.4665		76.7152		45.3056		52.3519						25.7331	5.28206			58.3904				16.3183
		52	31.8268		21.998				9.88374		66.6655		63.0983		50.7567		52.0914										51.5958				13.3081
		53	34.2676		26.8578				16.074		40.1255		79.256		39.9783		45.3875										52.7531				13.6996
		54	40.7012		40.2596				16.4092		49.7652		80.6795		38.7111		46.063										46.7969				13.0159
		55	37.4619		46.4847				19.6246		41.978		84.494		55.384		49.41										57.415				16.3124
		56	29.8427		19.7263				8.17301		39.3952		88.209		60.8536		60.5096										52.8915				17.7276
		57	29.9783		23.5238				15.8514		51.956		64.8697		52.2449		49.5025										45.2569				19.1041
		58	37.4648		8.13736				13.2571		16.0421		78.1198		38.5976		49.242										35.947				19.8108
		59	35.2371		27.4184				13.2805		-14.0896		77.0961		67.5186		54.0187										38.8808				11.1124
		60	27.4421		36.3175				19.773		24.0662		83.1425		74.8739		54.5328										39.8794				13.6989
		61	Inf		13.004				15.13		33.3058		68.2292		31.2585		39.97										38.8512				17.9152
					34.7691				15.3333		31.7477		85.8372		78.0616		41.8903										40.1423				15.9919
					32.4839				12.9314		45.1868		83.6924		41.1806		40.348										43.0605				17.95
					16.1346				12.8847		26.9489		85.5507		66.9487		24.6441										44.7809				14.8655
					15.574				20.1893		37.3441		85.4746		72.4739		28.0375										35.9563				11.4612
					15.0722				14.1846		26.7066		95.665		59.825		42.0517										33.1424				12.8837
					24.5997				10.9404		27.1205		69.1124		47.014		40.0714										21.7496				14.6898
					46.6587				14.4347		38.9746		68.5002		81.4925		35.6106										22.924				17.2664
					5.31415				12.5247		48.5689		80.2211		71.0097		34.5132										22.6456				12.9561
					1.40369				0.21436		41.48		61.6497		74.2021		36.1016										23.8745				14.1996
					22.4139						44.6854		64.8797		54.4295		31.4264										23.2896				23.4961
											35.6076		70.8646		60.6126		31.9639										18.8127				16.0261
											33.1291		68.2594		72.0105		39.5711										20.7416				14.8253
											51.675		81.9603		63.527		36.8375										21.3234				11.5572
											34.0613		85.9622		53.6766		30.2345										24.9167				16.5801
											45.9978		76.6395		60.8652		26.1656										29.5304				22.8664
											43.9215		82.072		61.1663		35.2786														21.9663
											51.1971		66.7305		56.8875		31.62														19.2712
											44.2294		75.4833		76.8222		31.3526														17.8079
											46.7654		73.1398		44.6348		31.0852														18.9113
											-14.24		77.6419		1.32744		56.2936														16.7881
											-14.5399		72.413		2.22398																20.7681
											40.1675		83.232		2.55062																17.0789
											30.6876		91.6042		-0.772832																19.9667
											29.7403		87.4304																		13.0416
											41.6146		80.2504																		14.345
											40.3089		72.393																		12.0323
											42.3634		67.3147																		12.4159
											50.7647		78.8353																		13.3857
											34.6384		65.6755																		19.6673
											45.5486		71.2091																		16.3841
											31.8604		67.0191																		16.2005
											35.4629		71.1669																		20.4536
											39.8966		70.6601																		18.9324
											35.4091		79.8774																		22.7677
											23.3312		66.7075																		13.316
											28.618		70.6743																		21.3748
											23.3733		64.5468																		19.5555
											23.9		54.8729																		23.0723
											21.6486		59.2787																		15.5313
											35.081		56.6781																		16.1439
											25.3184		68.9117																		25.5358
											25.7879		71.1769																		22.0235
											36.666		62.5484																		21.6998
											21.9935		58.5431																		17.1796
											27.6202		62.0671																		15.5945
											34.6048		60.8393																		22.1295
											28.7038		72.3955																		19.1495
											36.1074		70.6801																		18.4007
											28.8384		-37.8271																		22.6993
											15.4767		-39.035																		23.8665
											18.0074		#NAME?																		26.7754
																															19.3634
																															19.2923
																															19.4732
																															25.514
																															16.8868
																															23.781
																															21.5386
																															20.7457

## Sheet: summary-con
																								n=4,con
		con																		mean	se				mean	se
					8-3-2018-n1	8-1-2018-n3	8-9-2018-n2	9-6-2018-N1		8-9-2018-n2		10-29-2018-n2							1	0	0			1	113.132	9.20256
				1	314.038	327.468	155.634	174.895		133.459		91.4578							2	0	0			2	117.165	8.61413
				2	-12.0537	-64.1394	116.248	-43.5696		-32.7263		102.325							3	0	0			3	109.744	12.3818
				3	300.134	32.1085	107.608	-31.8029		-102.942		107.255							4	0	0			4	100.957	12.5123
				4	249.015	128.169	91.2167	171.956		1.61547		95.2661							5	0	0			5	94.6613	5.17867
				5	156.57	70.4889	85.7485	152.635		171.445		103.233							6	0	0			6	87.4092	9.48742
				6	110.655	77.0878	79.6618	128.007		259.399		104.122							7	0	0			7	94.3592	12.58
				7	131.198	67.3821	73.1721	126.361		254.609		100.38							8	0	0			8	95.7894	12.3563
				8	91.5371	72.3102	90.1224	116.733		215.08		100.945							9	0	0			9	90.5973	12.6096
				9	71.0947	68.306	75.2879	104.863		155.634		83.7423							10	88.6616	9.20256			10	100.54	18.5626
				10	78.5537	79.5261	80.3184	115.275		116.248		106.11							11	91.8226	8.61413			11	95.7598	16.5046
				11	69.3433	102.704	87.6349	116.933		107.608		103.314							12	86.0064	12.3818			12	104.724	15.0649
				12	88.398	112.021	52.3899	96.2418		91.2167		95.2197							13	79.1197	12.5123			13	106.24	12.5251
				13	51.6998	110.333	68.6974	66.9958		85.7485		95.9737							14	74.1861	5.17867			14	102.632	11.8246
				14	70.0606	85.2137	61.8082	94.1276		79.6618		77.6182							15	68.5026	9.48742			15	97.6736	11.2954
				15	40.9315	84.1915	75.7152	87.817		73.1721		103.61							16	73.9493	12.58			16	88.3285	6.1684
				16	38.0593	92.6124	75.003	96.1475		90.1224		92.7169							17	75.0701	12.3563			17	93.1538	9.89501
				17	50.769	108.924	65.2997	95.4169		75.2879		99.6182							18	71.0011	12.6096			18	95.6119	13.7069
				18	44.7778	101.71	57.1981	92.9215		80.3184		100.369							19	78.7935	18.5626			19	98.8167	9.12369
				19	35.5607	124.24	67.7386	100.001		87.6349		91.3141							20	75.047	16.5046			20	98.0303	18.6631
				20	54.3318	123.056	70.4102	99.336		52.3899		81.9007							21	82.072	15.0649			21	96.0777	20.9871
				21	55.4093	124.808	79.3734	84.5703		68.6974		101.138							22	83.2599	12.5251			22	98.9717	13.8795
				22	63.3854	113.235	94.611	97.6128		61.8082		84.4428							23	80.433	11.8246			23	103.325	12.1331
				23	56.8637	113.285	75.868	92.647		75.7152		112.743							24	76.5468	11.2954			24	105.39	14.1058
				24	47.0228	101.418	82.7433	93.1419		75.003		97.3579							25	69.2231	6.1684			25	101.299	14.6912
				25	53.8414	81.8971	75.8541	82.1969		65.2997		102.892							26	73.0046	9.89501			26	99.9982	17.8308
				26	55.5094	95.3344	83.9767	73.2023		57.1981		119.043							27	74.931	13.7069			27	94.2993	10.0243
				27	41.5386	106.717	83.73	73.1552		67.7386		122.499							28	77.4427	9.12369			28	98.2903	10.3747
				28	59.3623	102.393	77.6051	85.7181		70.4102		110.501							29	76.8264	18.6631			29	98.5093	12.4057
				29	23.4213	105.988	98.5228	91.2357		79.3734		97.3162							30	75.2961	20.9871			30	83.8203	13.9853
				30	12.513	93.4254	100.635	89.3725		94.611		96.4712							31	77.5641	13.8795			31	99.9913	12.8464
				31	40.7146	107.036	86.6378	86.0148		75.868		107.465							32	80.976	12.1331			32	102.309	15.248
				32	46.6859	102.657	91.8178	70.9953		82.7433		124.612							33	82.5943	14.1058			33	110.967	13.2862
				33	45.455	104.861	104.207	81.7948		75.8541		116.555							34	79.3877	14.6912			34	108.417	12.6425
				34	38.8265	85.6116	109.136	88.635		83.9767		118.087							35	78.3686	17.8308			35	98.8509	15.761
				35	28.6554	87.6691	113.42	85.1234		83.73		111.1							36	73.9024	10.0243			36	99.2685	16.1722
				36	45.058	81.7783	91.1681	79.0942		77.6051		103.828							37	77.0301	10.3747			37	99.7475	12.7323
				37	48.7442	82.2303	78.623	72.3789		98.5228		116.878							38	77.2017	12.4057			38	97.6105	10.0239
				38	42.7729	87.7939	77.6051	57.6172		100.635		101.492							39	65.69	13.9853			39	99.4179	11.6985
				39	24.699	79.3941	72.0291	60.9098		86.6378		107.207							40	78.3632	12.8464			40	101.919	12.4269
				40	40.0575	94.1961	87.3813	67.4394		91.8178		86.3054							41	80.1799	15.248			41	95.7191	14.9172
				41	36.0544	84.5861	95.8721	67.6667		104.207		100.622							42	86.9651	13.2862			42	92.0717	9.93357
				42	48.3839	96.5044	93.8362	56.3002		109.136		102.428							43	84.9664	12.6425			43	88.1794	13.9848
				43	52.4036	82.5715	91.4704	51.2886		113.42		90.9603							44	77.4694	15.761			44	92.3865	14.8998
				44	30.6035	98.8906	89.2156	47.6745		91.1681		92.5856							45	77.7967	16.1722			45	99.8353	11.5227
				45	32.5851	92.6177	107.361	54.8931		78.623		106.314							46	78.1721	12.7323			46	87.6488	14.7173
				46	42.5761	92.7859	99.7214	64.4879		77.6051		101.067							47	76.4973	10.0239			47	73.7033	14.9372
				47	52.1001	81.6041	100.256	62.4943		72.0291		80.2986							48	77.9138	11.6985			48	77.6195	13.4775
				48	42.8963	90.7409	90.6366	59.8284		87.3813		77.4003							49	79.8741	12.4269			49	95.0635	8.04459
				49	44.0939	81.9769	97.5536	67.151		95.8721		88.3046							50	75.0151	14.9172			50	84.911	10.2025
				50	32.2682	76.9149	97.0411	-7.32647		93.8362		78.3134							51	72.1566	9.93357			51	82.3201	15.4312
				51	47.0795	65.9383	84.1382	-28.2562		91.4704		82.9699							52	69.1062	13.9848			52
				52	30.5435	66.3923	90.2735	78.4482		89.2156		70.1839							53	72.4033	14.8998			53
				53	35.6841	66.4965	80.0717	65.8229		107.361		79.4211							54	78.2409	11.5227			54
				54	45.5517	83.3647	84.3258	47.9878		99.7214		85.9609							55	68.6904	14.7173			55
				55	29.3498		76.106	55.0595		100.256		76.0732							56	57.7613	14.9372			56
				56	18.3652		64.4381	66.5216		90.6366		71.6377							57	60.8304	13.4775			57
				57	32.9453		59.1036	71.5873		97.5536		70.204							58	74.5012	8.04459			58
				58	70.5409		71.5462	64.291		97.0411		81.2735							59	66.5448	10.2025			59
				59	39.5771		80.407	55.0206		84.1382		83.2819							60	64.5143	15.4312			60
				60	19.7992		71.27	66.7434		90.2735		74.8512							61	49.989	18.727
				61	-4.75566		63.4046	66.6076		80.0717		88.3988							62	60.9746	10.1846
				62	35.9143		67.7438	53.9656		84.3258		72.4951							63	65.8619	4.21826
				63	55.5294		66.8596	52.9675		76.106		105.239							64	42.2608	10.981
				64	32.3616		16.3506	58.5183		64.4381									65	50.247	6.38641
				65	32.1914		59.466	57.1334		59.1036									66	51.4813	9.80111
				66	27.8514		62.8922	62.8631		71.5462									67	63.4524	7.14909
				67	50.5756		70.1236	61.7125		80.407									68	57.2652	7.12266
				68	40.8314		66.8353	71.7204		71.27									69	47.4306	7.53926
				69	27.0975		51.0211	78.7186		63.4046									70	53.9125	6.98783
				70	35.7175		61.2941	77.1118		67.7438									71	52.578	7.39496
				71	39.04		63.7972	78.7671		66.8596									72	49.2476	8.4432
				72	31.4875		67.2869	59.5928		59.466									73	54.1487	9.03178
				73	41.3218		75.2896	56.0368		62.8922									74	55.8062	9.84663
				74	43.4401		74.8762	55.3922		70.1236									75	52.4979	9.43778
				75	43.2499		69.5086	62.0341		66.8353									76	44.6432	8.04014
				76	23.9751		61.9316	66.7074		51.0211									77	47.909	8.10667
				77	32.3148		62.5013	63.6866		61.2941									78	46.0775	8.39671
				78	37.719		55.8605	54.114		63.7972									79	56.3722	13.3565
				79	38.2027		88.8543	57.8266		67.2869									80	44.6735	15.5606
				80	24.5289			64.1732		75.2896									81	48.3406	13.3645
				81	37.8524			63.5923		74.8762									82	45.0104	12.322
				82	30.4434			59.8395		69.5086									83	41.6977	10.1525
				83	33.0521			59.2545		61.9316									84	46.4154	8.37759
				84	42.4326			63.4897		62.5013									85	37.8208	9.25128
				85	25.2394			61.2134		55.8605									86	51.1681	18.8497
				86	33.1889			64.5115		88.8543									87	43.953	12.5038
				87	56.4568			62.6316											88	41.1972	9.0348
				88	50.232			67.9329											89	46.2898	9.1162
				89	55.406			65.7689											90	31.8432	1.63265
				90	33.4758			55.4615											91	38.3766	3.07185
				91	41.4485			57.5216											92	35.8731	0.7561
				92	35.117			55.8705											93	38.3122	5.8885
				93	44.2007			55.8289											94	30.1035	31.9309
				94	62.0344			64.4726											95	7.8417	45.7062
				95	53.5479			61.2342											96	-0.7382	43.0007
				96	42.2625			49.8053											97	33.2212	8.08725
				97	41.3084			48.1888											98	42.7394	3.68265
				98	39.0567			57.8612											99	56.4617	19.8437
				99	76.3054			55.9523											100	44.3505	11.9261
				100	56.2766			39.2387											101	47.7101	12.0859
				101	59.796			43.9328											102	33.8959	4.4503
				102	38.3462			46.0955											103	38.9214	9.2923
				103	48.2137			47.1394											104	33.9104	10.704
				104	44.6143			37.747											105	34.6065	13.9407
				105	48.5473			40.2895											106	44.8148	16.9761
				106	61.7909			31.148											107	31.508	6.6347
				107	38.1427			42.5492											108	44.3002	23.0761
				108	67.3763			38.3902											109	-25.8287	0
				109	-25.8287			40.3505
								47.6495
								43.5044
								-6.93053
								-15.52
								#NAME?

## Sheet: summay -nmda
		before	after	RATIO						mean		se	n
	9-6-2018-n1	50	55	1.1					before	31.2	17.1814	7.68375	5
	8-30-2018-n2	20	23	1.15					after	29.8	17.2829	7.72917
	8-9-2018-n2	18	16	0.888889
	8-1-2018-n2	18	15	0.833333
	8-1-2018-n3	50	40	0.8	P
					0.621308
										mean		se
									ratio	0.95444	0.15988	0.0715

## Sheet: crispr+paPI2
	crispr+paPI2
		GFP
			10-30-2018-N2		10-30-2018-N3		10-31-2018-N1-1		10-31-2018-N1-2		10-31-2018-N4
		1	101.288		103.476		113.129		113.744		97.2282
		2	84.2979		100.091		122.264		102.075		108.454
		3	106.783		86.0221		107.085		97.9992		94.1416
		4	105.101		93.2532		86.6867		106.91		92.5876
		5	98.6189		92.2583		86.651		104.642		81.8081
		6	106.807		97.8603		103.869		101.364		87.9029
		7	100.188		74.5607		124.38		92.914		125.389
		8	104.645		89.4917		81.8683		79.2831		103.075
		9	95.2974		74.8962		92.4183		91.1458		98.8018
		10	57.7704		82.1319		93.4839		95.9471		110.562
		11	80.6561		76.5575		89.8077		80.1967		89.1513
		12	74.2919		83.8461		88.0065		70.9287		83.0189
		13	57.7259		82.1825		121.04		86.3192		86.648
		14	75.7361		87.5547		93.9215		105.744		84.3572
		15	79.4491		87.2721		85.9087		101.049		94.555
		16	65.0243		115.533		94.2084		94.9548		94.8736
		17	71.9846		93.0211		107.132		98.1004		96.8655
		18	94.5471		123.834		89.6539		87.081		93.1873
		19	72.7968		119.889		83.6303		74.7995		77.429
		20	72.5807		101.539		75.9214		72.7053		111.083
		21	81.9106		134.193		74.809		85.1526		69.7377
		22	64.2592		112.957		97.4008		105.415		94.4945
		23	121.202		111.532		97.1756		92.7819		77.6414
		24	96.8128		117.205		97.4186		87.0867		112.382
		25	94.2802		128.756		94.6498		64.3789		126.995
		26	74.4935		116.9		86.7558		87.2834		98.4864
		27	86.0565		143.133		101.739		80.0759		93.7739
		28	99.7725		131.881		89.9705		78.0913		115.122
		29	96.0121		81.0336		93.8428		84.4864		105.897
		30	78.1531		90.574		111.601		73.1663		99.1041
		31	67.2722		118.676		86.7982		63.6452		125.568
		32	109.776		134.627		83.1377		80.8489		114.297
		33	74.4342		126.897		70.2473		58.3154		122.166
		34	77.127		114.763		87.2061		86.7353		97.8034
		35	79.7821		93.6806		82.0119		93.3778		88.1039
		36	71.6483		92.4145		88.8135		80.3991		78.4372
		37	84.0666		97.3157		86.4972		73.8072		104.006
		38	77.7231		101.686		98.6826		70.15		84.8523
		39	88.9598		91.0864		95.0065		74.4088		82.1905
		40	83.8086		134.407		87.253		87.5673		86.6611
		41	89.1615		123.407		99.3002		90.0917		89.9961
		42	75.054		144.439		94.0234		84.8125		81.2673
		43	69.7011		112.433		96.5113		90.7844		94.6971
		44	78.2065		117.86		137.461		69.3123		99.3148
		45	94.7754		120.045		113.236		82.1476		92.7837
		46	99.8526		134.083		94.0747		66.0121		82.8718
		47	112.326		98.676		108.984		80.6156		71.326
		48	114.592		99.2596		119.455		81.7372		59.4451
		49	92.1742		99.9375		110.179		94.6287		73.8113
		50	119.104		74.802		113.45		79.8707		63.2376
		51	98.6189		103.77		118.659		87.2666		56.7098
		52	91.5429		105.85		114.863		96.2901		65.1004
		53	93.696		101.282		118.399		93.8276		83.2101
		54	67.9391		85.5166		113.454		106.494		57.2899
		55	68.3458		98.4485		99.396		90.9434		74.5482
		56	60.6885		95.659		101.764		67.7662		73.9518
		57	66.0712		82.8994		100.419		89.6672		68.6789
		58	83.6277		93.63		103.886		94.2352		76.4927
		59	94.8496		81.8309		100.203		96.6133		62.5661
		60	69.2406		86.8378		96.3419		75.4123		84.7395
		61	66.0682		86.1806		90.8734		105.924		61.45
		62	54.176		84.6227		108.151		97.5101		60.5562
		63	63.9656		82.8741		104.055		117.972		70.4828
		64	54.8789		71.893		106.396		80.9332		65.8537
		65	49.2976		87.8925		112.145		95.8954		65.3243
		66	71.9846		62.9547		101.772		91.3061		60.0824
					67.6582		109.276		92.8915		57.6624
					71.6403		96.5893		84.4358		52.8209
					78.2579		97.2291		87.7248		60.1592
					66.5897		73.8548		111.771		60.182
					44.3817		93.7469		99.4413		51.4074
					61.1854		103.783		98.6064		72.1511
					69.1518		103.774		77.4841		58.0627
					46.5163		98.647		87.0361		68.2459
					60.7269		87.467		91.6434
							90.1113		89.0656
							67.9922		124.651
							74.4211
							80.322
							74.9605

## Sheet: LONG
		8-1-2018-n2		8-30-2018-n2		9-6-2018-N1		10-29-2018-N2		10-26-2018-N1-1			12-11-2018-N2		Myc-2 cells
	1	241.791		167.311		159.178		89.5415		109.504			86.638		100.565
	2	208.424		144.046		128.867		97.7363		126.663			104.409		106.436
	3	136.64		122.108		124.914		104.771		77.2781			134.392		123.248
	4	-24.5078		97.8831		123.759		92.3488		99.2526			118.573		119.142
	5	-51.9643		72.1441		98.6094		102.43		103.884			105.849		121.749
	6	-35.6929		103.214		90.3647		105.95		95.7951			73.0592		119.57
	7	-47.4625		95.2969		88.3981		101.112		83.5164			104.85		111.284
	8	119.056		99.7256		91.6514		119.749		106.138			84.3152		107.462
	9	117.978		118.107		84.3665		105.699		114.766			115.396		108.425
	10	89.5699		80.5488		97.4088		87.0395		83.7704			121.152		110.284
	11	93.8663		97.4339		107.843		86.0392		115.245			82.1435		111.476
	12	95.2234		101.911		96.22		91.8835		91.1799			96.3175		116.99
	13	111.9		78.6844		66.5022		102.215		115.346			67.4542		108.779
	14	93.6413		97.8192		75.4979		156.254		105.477			76.0293		110.924
	15	100.537		106.215		82.307		139.998		76.026			103.874		99.7409
	16	81.6334		92.6333		108.414		101.882		85.2226			93.0448		89.2777
	17	79.913		78.6609		90.2259		115.505		89.8558			92.2595		91.0757
	18	91.5364		71.3162		97.1981		115.63		95.5456			106.101		80.0288
	19	82.4937		76.5256		97.1479		110.8		96.7123			102.638		79.1917
	20	76.4511		90.6479		97.1571		141.629		72.5595			131.505		76.1137
	21	80.8506		61.2996		89.2298		111.833		86.6142			85.314		66.3174
	22	199.115		97.8444		91.996		95.1153		98.9986			86.6249		67.2746
	23	71.2242		69.8927		93.9852		97.9395		92.1106			104.337		64.7011
	24	78.3989		87.7033		91.1421		101.01		92.7693			97.6577		59.1911
	25	78.8981		97.1966		90.2455		90.3122		91.0563			79.7352		59.8492
	26	64.0706		74.1178		73.2908		86.5947		93.6258			81.1086		56.5134
	27	85.372		74.3382		70.8403		88.8947		74.6232			76.0833		56.3302
	28	77.8832		86.8216		73.6015		86.8508		84.6989			96.2341		53.1106
	29	107.412		80.7002		57.9518		85.9274		73.6386			78.6379		53.7148
	30	101.711		66.0176		57.8084		97.1339		66.1369			92.0328		47.733
	31	87.9292		53.6823		68.4162		94.3891		68.8345			92.1018		47.7629
	32	81.9475		76.0578		68.3631		91.898		82.0507			83.7731		48.8942
	33	106.671		66.1724		62.0583		93.0329		68.4883			84.6306		49.5934
	34	126.259		73.9916		57.7273		90.8351		75.8439			75.6547		48.3522
	35	108.68		47.9463		48.2687		80.154		86.2567			75.1422		43.8312
	36	105.473		67.7558		54.9945		86.3218		65.7413			80.6519		48.6972
	37	92.4037		66.6436		49.4646		83.7393		85.081			103.365		43.1975
	38	120.802		45.3113		39.3512		76.3837		69.1021			75.1947		41.1451
	39	121.602		56.1945		49.4759		67.3172		45.6641			71.6201		31.306
	40	131.062		56.0111		65.4814		79.5914		62.5513			86.8352		32.4725
	41	129.304		45.3382		56.993		71.173		34.6668			77.051		29.4682
	42	126.221		33.2335		43.2949		79.6298		55.243			85.9383		30.3045
	43	118.747		51.3098		42.9399		83.4663		36.8429			67.3523		26.2299
	44	121.7		34.45		56.8759		74.1366		36.8766			70.3355		26.6315
	45	144.928		25.7458		66.889		80.3368		49.9624			64.4742		29.2535
	46	126.568		33.501		63.1188		81.0281		47.7795			75.1784		29.1573
	47	153.249		40.6639		61.1647		78.1162		41.0782			61.9082		25.3003
	48	144.769		39.2135		64.9909		78.5562		40.8152			65.2529		26.7954
	49	123.833		39.7334		72.8417		65.1687		52.1879			68.3576		36.797
	50	151.332		41.8552		89.4657		82.5754		43.3329			78.8285		30.5819
	51	127.328		41.4665		76.7152		80.3993		34.487			68.7257		27.6933
	52	106.837		66.6655		63.0983		74.1005		47.1681			74.0383		32.3194
	53	137.711		40.1255		79.256		74.6872		50.9965			68.6698		31.7784
	54	122.12		49.7652		80.6795		60.4029		58.3542			64.4972		30.6992
	55	115.027		41.978		84.494		80.6301		43.1981			77.4551		29.3489
	56	124.175		39.3952		88.209		72.1528		52.2396			69.892		31.6816
	57	150.197		51.956		64.8697		77.5234		72.6157			66.912		41.7895
	58	134.578		16.0421		78.1198		78.1077		43.7713			61.813		36.4419
	59	123.048		-14.0896		77.0961		71.0611		58.4172			62.1186		43.1397
	60	130.305		24.0662		83.1425		63.7356		46.8623			50.764		35.0382
	61	129.322		33.3058		68.2292		78.7065		59.2467			57.2264		39.7614
	62	145.699		31.7477		85.8372		68.5676		69.7495			61.1887		38.0172
	63	125.654		45.1868		83.6924		81.2132		62.9717			73.6539		36.1677
	64	128.214		26.9489		85.5507		75.7645		50.3288			56.0568		30.7734
	65	123.125		37.3441		85.4746		80.0711		73.2025			68.1638		33.9744
	66	130.478		26.7066		95.665		92.6398		68.5311			61.0245		32.1664
	67	99.7963		27.1205		69.1124		95.3293		69.4123			57.3251		32.6788
	68	124.705		38.9746		68.5002		85.9923		67.0496			59.937		35.5838
	69	129.039		48.5689		80.2211		75.732		51.554			74.3503		28.3569
	70	124.541		41.48		61.6497		75.0744		72.1661			69.662		29.4181
	71	135.557		44.6854		64.8797		83.6298		60.0538			75.4215		27.353
	72	119.202		35.6076		70.8646		96.974		60.5416			77.7212		32.6016
	73	119.567		33.1291		68.2594		90.7041		47.9099			64.4413		25.9379
	74	136.298		51.675		81.9603		91.8956		72.5932			71.5314		28.1094
	75	146.85		34.0613		85.9622		86.4588		54.1707			63.1173		27.9069
	76	159.369		45.9978		76.6395		80.7997		64.8241			75.9471		30.5745
	77	129.032		43.9215		82.072		90.9554		49.3824			59.2404		28.9867
	78	130.79		51.1971		66.7305		78.9818		27.9812			66.4061		29.7119
	79	123.636		44.2294		75.4833		83.4291		1.25665			58.9185		29.7254
	80	142.596		46.7654		73.1398		67.1633		2.63918			63.7219		32.808
	81	129.28		-14.24		77.6419		78.3049		1.6478			65.0065		32.5862
	82	150.764		-14.5399		72.413		79.7104		-2.25927			67.6842		33.5882
	83	143.025		40.1675		83.232		70.7858					56.4774		37.9482
	84	144.073		30.6876		91.6042		72.0506					77.8626		35.8192
	85	138.656		29.7403		87.4304		82.7341					67.4312		35.0347
	86	129.283		41.6146		80.2504		78.6512					60.2951		34.2573
	87	111.453		40.3089		72.393		62.4888					58.6754		34.6674
	88	105.701		42.3634		67.3147		60.2333					57.9099		34.4905
	89	134.198		50.7647		78.8353		68.7191					67.6381		32.902
	90	129.105		34.6384		65.6755		60.9439					73.4633		31.8487
	91	123.636		45.5486		71.2091		64.5676					65.7128		30.5884
	92	139.976		31.8604		67.0191		54.6175					61.0508		29.1365
	93	114.132		35.4629		71.1669		61.8059					49.0883		31.0102
	94	112.439		39.8966		70.6601		66.8952					56.4051		32.0461
	95	115.782		35.4091		79.8774		59.2006					60.7715		32.258
	96	122.781		23.3312		66.7075		55.7488					56.2244		36.5958
	97	117.744		28.618		70.6743		54.6331					61.6356		32.9636
	98	104.32		23.3733		64.5468		63.2475					62.4043		32.4964
	99	124.325		23.9		54.8729		64.8105					67.1124		31.9075
	100	121.009		21.6486		59.2787		58.2496					71.8534		34.3539
	101	120.474		35.081		56.6781		68.7924					68.0455		35.9681
	102	115.922		25.3184		68.9117		56.4161					61.4746		40.1223
	103	111.971		25.7879		71.1769		81.8973					74.0481		42.1968
	104	121.416		36.666		62.5484							57.9197		38.4817
	105	128.943		21.9935		58.5431							55.4063		34.2304
	106	118.501		27.6202		62.0671							69.1363		36.8967
	107	92.6029		34.6048		60.8393							57.2823		32.3713
	108	119.766		28.7038		72.3955							54.4404		30.3246
	109	115.915		36.1074		70.6801							56.8979		33.9438
	110	109.013		28.8384		-37.8271							51.3684		33.6037
	111	119.005		15.4767		-39.035							63.5543		28.3889
	112	116.185		18.0074									76.394		35.9842
	113	123.589				#NAME?							71.1668		30.4162
	114	108.016											74.3011		29.7116
	115	124.982											68.5383		31.7841
	116	106.003											60.1012		27.9841
	117	124.185											71.492		30.0699
	118	126.425											78.0136		27.5853
	119	123.805											69.0312		25.3332
	120	101.953											64.3724		25.4665
	121	110.48											70.3256		27.4767
	122	121.752											68.7453		22.7097
	123	100.591											73.23
	124	108.328											71.1306
	125	89.9801											72.4744
	126	118.301											72.5663
	127	110.796											77.2942
	128	92.9029											60.8471
	129	110.89											68.5022
	130	97.6587											72.2904
	131	129.714											63.3834
	132	108.645											70.7856
	133	116.515
	134	118.566
	135	115.777
	136	100.335
	137	99.0979
	138	91.0536
	139	116.356
	140	120.8
	141	89.8887
	142	109.676
	143	92.6873
	144	93.3037
	145	96.8454
	146	80.2294
	147	69.553
	148	47.4476
	149	53.9473
	150	59.4414
	151	68.2287
	152	62.9314
	153	63.9182
	154	76.3198
	155	59.0101
	156	45.0029
	157	58.6585
	158	49.9322
	159	73.7696
	160	59.7086
	161	59.2023
	162	55.5903
	163	51.5846
	164	46.2264
	165	54.92
	166	67.4974
	167	51.1229
	168	56.9381
	169	57.8405
	170	63.7846
	171	60.3367
	172	46.7304
	173	45.4483
	174	49.5665
	175	44.4193
	176	57.8217
	177	56.0169
	178	37.5587
	179	-41.4933
	180	-27.5619
	181	-31.2864
		-30.6395
		-28.2487
		-27.6112
		-31.1622
		35.6148
		50.6166
		49.9861
		56.8443
		35.5711
		50.1595
		61.211
		72.368
		81.7905
		70.8562
		58.4147
		63.8315
		82.3999
		76.2261
		61.7361
		61.0774
		78.3426
		57.7631
		50.1619
		38.8783
		54.2449
		40.7605
		46.5569
		77.1402
		48.6969
		46.3038
		44.0794
		47.9984
		56.5748
		65.9434
		46.6437
		66.8129
		58.3046
		62.0736
		63.6651
		63.3182
		48.9923
		71.3859
		63.8971
		72.8813
		81.7155
		62.0736
		76.7441
		64.4362
		62.8471
		59.507
		61.7103
		42.4012
		45.6053
		57.8288
		62.3244
		47.3632
		71.2499
		48.0289
		53.6871
		75.3588
		54.9411
		41.7566
		67.0989
		45.1014
		49.4798
		64.2862
		77.0652
		53.6965
		56.9475
		58.5952
		45.2022
		59.5586
		60.4211
		41.5691
		66.7122
		69.3678
		51.5096
		67.5396
		43.9927
		56.9615
		52.6159
		56.1927
		69.4217
		60.8547
		56.0333
		66.0676
		62.6853
		47.4804
		68.742
		56.0896
		55.0606
		65.6691
		65.1699
		67.9919
		71.9226
		67.1036
		56.5068
		56.1646
		40.5917
		61.5485
		62.8986
		52.5737
		47.9164
		57.7842
		112.024

## Sheet: long-summary
				8-30-2018-n2	12-11-2018-N2	my	10-29-2018-N2		12-17-2018-n2
		1	123.125	97.8831	86.638	100.565	89.5415		73.6379
		2	130.478	72.1441	104.409	106.436	97.7363		74.6511
		3	124.705	103.214	134.392	123.248	104.771		72.8601
		4	129.039	95.2969	118.573	119.142	92.3488		71.4784
		5	124.541	99.7256	105.849	121.749	102.43		71.8936
		6	135.557	118.107	73.0592	119.57	105.95		69.3979
		7	119.202	80.5488	104.85	111.284	101.112		68.8689
		8	119.567	97.4339	84.3152	107.462	119.749		67.9938
		9	136.298	101.911	115.396	108.425	105.699		69.1012
		10	146.85	78.6844	121.152	110.284	87.0395		70.7665
		11	159.369	97.8192	82.1435	111.476	86.0392		68.0971
		12	129.032	106.215	96.3175	116.99	91.8835		57.3828
		13	130.79	92.6333	67.4542	108.779	102.215		57.188
		14	123.636	78.6609	76.0293	110.924	156.254		56.3063
		15	142.596	71.3162	103.874	99.7409	139.998		56.5761
		16	129.28	76.5256	93.0448	89.2777	101.882		49.5029
		17	150.764	90.6479	92.2595	91.0757	115.505		40.5111
		18	143.025	61.2996	106.101	80.0288	115.63		44.2668
		19	144.073	97.8444	102.638	79.1917	110.8		46.6368
		20	138.656	69.8927	131.505	76.1137	141.629		38.6478
		21	129.283	87.7033	85.314	66.3174	111.833		39.8972
		22	111.453	97.1966	86.6249	67.2746	95.1153		38.3701
		23	105.701	74.1178	104.337	64.7011	97.9395		34.2782
		24	134.198	74.3382	97.6577	59.1911	101.01		27.5498
		25	129.105	86.8216	79.7352	59.8492	90.3122		27.7268
		26	123.636	80.7002	81.1086	56.5134	86.5947		22.7493
		27	139.976	66.0176	76.0833	56.3302	88.8947		14.6416
		28	114.132	53.6823	96.2341	53.1106	86.8508		23.0063
		29	112.439	76.0578	78.6379	53.7148	85.9274		25.566
		30	115.782	66.1724	92.0328	47.733	97.1339		25.0719
		31	122.781	73.9916	92.1018	47.7629	94.3891		32.4668
		32	117.744	47.9463	83.7731	48.8942	91.898		26.5661
		33	104.32	67.7558	84.6306	49.5934	93.0329		24.8541
		34	124.325	66.6436	75.6547	48.3522	90.8351		23.7231
		35	121.009	45.3113	75.1422	43.8312	80.154		22.4663
		36	120.474	56.1945	80.6519	48.6972	86.3218		22.4966
		37	115.922	56.0111	103.365	43.1975	83.7393		19.6654
		38	111.971	45.3382	75.1947	41.1451	76.3837		16.3117
		39	121.416	33.2335	71.6201	31.306	67.3172		15.9373
		40	128.943	51.3098	86.8352	32.4725	79.5914		15.0866
		41	118.501	34.45	77.051	29.4682	71.173		15.7998
		42	92.6029	25.7458	85.9383	30.3045	79.6298		17.2052
		43	119.766	33.501	67.3523	26.2299	83.4663		16.2492
		44	115.915	40.6639	70.3355	26.6315	74.1366		18.3264
		45	109.013	39.2135	64.4742	29.2535	80.3368		14.1378
		46	119.005	39.7334	75.1784	29.1573	81.0281		16.3156
		47	116.185	41.8552	61.9082	25.3003	78.1162		14.7819
		48	123.589	41.4665	65.2529	26.7954	78.5562		13.3772
		49	108.016	40.1255	68.3576	36.797	65.1687		16.3183
		50	124.982	49.7652	78.8285	30.5819	82.5754		13.3081
		51	106.003	41.978	68.7257	27.6933	80.3993		13.6996
		52	124.185	39.3952	74.0383	32.3194	74.1005		13.0159
		53	126.425	51.956	68.6698	31.7784	74.6872		16.3124
		54	123.805	24.0662	64.4972	30.6992	60.4029		17.7276
		55	101.953	33.3058	77.4551	29.3489	80.6301		19.1041
		56	110.48	31.7477	69.892	31.6816	72.1528		19.8108
		57	121.752	45.1868	66.912	41.7895	77.5234		11.1124
		58	100.591	26.9489	61.813	36.4419	78.1077		13.6989
		59	108.328	37.3441	62.1186	43.1397	71.0611		17.9152
		60	89.9801	26.7066	50.764	35.0382	63.7356		15.9919
		61	118.301	27.1205	57.2264	39.7614	78.7065		17.95
		62	110.796	38.9746	61.1887	38.0172	68.5676		14.8655
		63	92.9029	48.5689	73.6539	36.1677	81.2132		11.4612
		64	110.89	41.48	56.0568	30.7734	75.7645		12.8837
		65	97.6587	44.6854	68.1638	33.9744	80.0711		14.6898
		66	129.714	35.6076	61.0245	32.1664	92.6398		17.2664
		67	108.645	33.1291	57.3251	32.6788	95.3293		12.9561
		68	116.515	51.675	59.937	35.5838	85.9923		14.1996
		69	118.566	34.0613	74.3503	28.3569	75.732		23.4961
		70	115.777	45.9978	69.662	29.4181	75.0744		16.0261
		71	100.335	43.9215	75.4215	27.353	83.6298		14.8253
		72	99.0979	51.1971	77.7212	32.6016	96.974		11.5572
		73	91.0536	44.2294	64.4413	25.9379	90.7041		16.5801
		74	116.356	46.7654	71.5314	28.1094	91.8956		22.8664
		75	120.8	40.1675	63.1173	27.9069	86.4588		21.9663
		76	--	30.6876	75.9471	30.5745	80.7997		19.2712
		77	--	29.7403	59.2404	28.9867	90.9554		17.8079
		78	--	41.6146	66.4061	29.7119	78.9818		18.9113
		79	--	40.3089	58.9185	29.7254	83.4291		16.7881
		80	--	42.3634	63.7219	32.808	67.1633		20.7681
		81	--	50.7647	65.0065	32.5862	78.3049		17.0789
		82	--		67.6842	33.5882	79.7104		19.9667
		83	--		56.4774	37.9482	70.7858		13.0416
		84	--		77.8626	35.8192	72.0506		14.345
		85	--		67.4312	35.0347	82.7341		12.0323
		86	--		60.2951	34.2573	78.6512		12.4159
		87	--		58.6754	34.6674	62.4888		13.3857
		88	--		57.9099	34.4905	60.2333		19.6673
		89	--		67.6381	32.902	68.7191		16.3841
		90	--		73.4633	31.8487	60.9439		16.2005
		91	--		65.7128	30.5884	64.5676		20.4536
		92	--		61.0508	29.1365	54.6175		18.9324
		93	--		49.0883	31.0102	61.8059		22.7677
		94	--		56.4051	32.0461	66.8952		13.316
		95	--		60.7715	32.258	59.2006		21.3748
		96	--		56.2244	36.5958	55.7488		19.5555
		97	--		61.6356	32.9636	54.6331		23.0723
		98	--		62.4043	32.4964	63.2475		15.5313
		99	--		67.1124	31.9075	64.8105		16.1439
		100	--		71.8534	34.3539	58.2496		25.5358
		101	--		68.0455	35.9681	68.7924		22.0235
		102	--		61.4746	40.1223	56.4161		21.6998
		103	--		74.0481	42.1968	81.8973		17.1796
		104	--		57.9197	38.4817			15.5945
		105	--		55.4063	34.2304			22.1295
		106	--		69.1363	36.8967			19.1495
		107	--		57.2823	32.3713			18.4007
		108	--		54.4404	30.3246			22.6993
		109	--		56.8979	33.9438			23.8665
		110	--		51.3684	33.6037			26.7754
		111	--		63.5543	28.3889			19.3634
		112	--		76.394	35.9842			19.2923
		113	--		71.1668	30.4162			19.4732
		114	--		74.3011	29.7116			25.514
		115	--		68.5383	31.7841			16.8868
		116	--		60.1012	27.9841			23.781
		117	--		71.492	30.0699			21.5386
		118	--		78.0136	27.5853			20.7457
		119	--		69.0312	25.3332
		120	--		64.3724	25.4665
		121	--		70.3256	27.4767
		122	--		68.7453	22.7097
		123	--		73.23
		124	--		71.1306
		125	--		72.4744
		126	--		72.5663
		127	--		77.2942
		128	--		60.8471
		129	--		68.5022
		130	--		72.2904
		131	--		63.3834
		132	--		70.7856
		133	--
		134	--
		135	--
		136	--
		137	--
		138	--
		139	--
		140	--
		141	--
		142	--
		143	--
		144	--
		145	--
		146	--
		147	--
		148	--
		149	--
		150	--
		151	--
		152	--
		153	--
		154	--
		155	--
		156	--
		157	--
		158	--
		159	--
		160	--
		161	--
		162	--
		163	--
		164	--
		165	--
		166	--
		167	--
		168	--
		169	--
		170	--
		171	--
		172	--
		173	--
		174	--
		175	--
		176	--
		177	--
		178	--
		179	--
		180	--
		181	--
		--	--
		--	--
		--	--
		--	--
		--	--
		--	--
		--	--
		--	--
		--	--
		--	--
		--	--
		--	--
		--	--
		--	--
		--	--
		--	--
		--	--
		--	--
		--	--
		--	--
		--	--
		--	--
		--	--
		--	--
		--	--
		--	--
		--	--
		--	--
		--	--
		--	--
		--	--
		--	--
		--	--
		--	--
		--	--
		--	--
		--	--
		--	--
		--	--
		--	--
		--	--
		--	--
		--	--
		--	--
		--
		--
		--
		--
		--
		--
		--
		--
		--
		--
		--
		--
		--
		--
		--
		--
		--
		--
		--
		--
		--
		--
		--
		--
		--
		--
		--
		--
		--
		--
		--
		--
		--
		--
		--
		--
		--
		--
		--
		--
		--
		--
		--
		--
		--
		--
		--
		--
		--
		--
		--
		--
		--
		--
		--
		--
		--
		--
		--
		--

## Sheet: gfp 2nd sumary
																	n=8
																		mean	se
	1	92.9405	73.6379	53.735	--	112.969	128.326	131.095	106.859	--	--	98.6094					1	99.7715	9.32668
	2	116.885	74.6511	112.5	--	184.101	120.166	94.0377	89.8679	--	--	90.3647					2	110.322	11.9091
	3	92.1596	72.8601	109.696	--	79.7756	96.365	95.169	64.9403	--	--	88.3981					3	87.4205	5.06293
	4	106.839	71.4784	121.178	--	71.4867	91.5018	98.2294	60.1544	--	--	91.6514					4	89.0649	7.1936
	5	87.6517	71.8936	116.47	--	76.0391	93.7115	114.896	51.025	--	--	84.3665					5	87.0067	7.72475
	6	96.2383	69.3979	103.248	--	110.191	86.5031	103.921	22.7959	--	--	97.4088					6	86.213	10.097
	7	96.3269	68.8689	100.194	--	98.1908	89.2683	85.9039	51.2022	--	--	107.843					7	87.2248	6.59667
	8	99.0382	67.9938	104.878	--	83.4758	83.0286	107.101	84.3999	--	--	96.22					8	90.7669	4.69854
	9	91.4347	69.1012	109.165	--	78.2453	109.021	120.401	70.0175	--	--	66.5022					9	89.236	7.53217
	10	80.0948	70.7665	116.528	--	91.3306	103.054	117.362	91.1796	--	--	75.4979					10	93.2267	6.29774
	11	113.488	68.0971	103.858	--	94.4725	105.575	115.417	87.2072	--	--	82.307					11	96.3027	5.79603
	12	110.562	57.3828	90.3801	--	91.4052	107.38	105.525	105.577	--	--	108.414					12	97.0783	6.28603
	13	104.711	57.188	85.4309	--	118.692	93.778	101.588	110.237	--	--	90.2259					13	95.2314	6.64986
	14	88.8416	56.3063	78.5902	--	93.8125	81.7447	114.057	111.13	--	--	97.1981					14	90.21	6.58211
	15	89.7765	56.5761	100.408	--	106.909	56.4543	138.158	126.807	--	--	97.1479					15	96.5296	10.3688
	16	84.511	49.5029	94.1152	--	104.599	69.4608	117.951	131.266	--	--	97.1571					16	93.5704	9.21514
	17	84.0615	40.5111	85.9677	--	123.871	44.2269	101.423	176.151	--	--	89.2298					17	93.1803	15.3619
	18	94.3343	44.2668	85.684	--	56.0348	54.3955	102.266	131.23	--	--	91.996					18	82.5259	10.3144
	19	94.1305	46.6368	70.5382	--	124	52.9274	72.4037	158.228	--	--	93.9852					19	89.1062	13.2158
	20	99.5718	38.6478	79.9983	--	66.9366	41.5079	89.4445	151.514	--	--	91.1421					20	82.3454	12.6977
	21	112.869	39.8972	58.8285	--	76.0098	42.0412	59.0798	132.883	--	--	90.2455					21	76.4818	11.8275
	22	83.2681	38.3701	66.4009	--	116.387	33.3582	47.731	136.853	--	--	73.2908					22	74.4574	13.0253
	23	86.4819	34.2782	50.6103	--	94.3663	40.4133	63.437	123.884	--	--	70.8403					23	70.5389	10.6383
	24	81.4015	27.5498	59.5669	--	49.9272	42.8724	64.7447	100.159	--	--	73.6015					24	62.4779	8.10333
	25	93.1832	27.7268	53.4933	--	74.7281	33.9708	77.3523	99.0284	--	--	57.9518					25	64.6793	9.19317
	26	65.0823	22.7493	53.2955	--	71.3986	34.27	64.1288	98.9954	--	--	57.8084					26	58.466	8.20934
	27	75.436	14.6416	48.6911	--	69.6558	32.3603	46.6241	93.249	--	--	68.4162					27	56.1343	8.98056
	28	75.8233	23.0063	64.9288	--	70.8041	20.0011	43.287	81.4993	--	--	68.3631					28	55.9641	8.49477
	29	53.9649	25.566	58.4349	--	57.6419	23.9342	60.7917	87.1769	--	--	62.0583					29	53.6961	7.26588
	30	59.2241	25.0719	42.2163	--	56.9186	22.3075	53.0541	100.331	--	--	57.7273					30	52.1063	8.60707
	31	59.2288	32.4668	43.8173	--	51.8531	16.7763	58.0515	89.2518	--	--						31	50.2065	8.65102
	32	62.5219	26.5661	43.5031	--	34.0684	15.9684	--	100.85	--	--						32	47.2463	12.5171
	33	55.8937	24.8541	48.3109	--	55.7364	13.2791	--	91.1618	--	--						33	48.206	11.1448
	34	53.6117	23.7231	45.747	--	73.9867	9.29622		70.4269	--	--						34	46.1319	10.4583
	35	57.625	22.4663	36.5487	--	57.8273				--							35	43.6168	8.63843
	36	43.9176	22.4966	30.3662	--	60.5194				--							36	39.325	8.33541
	37	45.5151	19.6654	28.2359	--	34.6923				--							37	32.0272	5.44835
	38	39.1794	16.3117	43.5241	--	49.4594				--							38	37.1187	7.24856
	39	40.693	15.9373	43.4047	--	41.643				--							39	35.4195	6.51832
	40	47.4129	15.0866	46.8952	--	61.3806				--							40	42.6938	9.79488
	41	50.4229	15.7998	42.2698	--	57.764				--							41	41.5641	9.15247
	42	42.8349	17.2052	42.3309	--	42.3437				--							42	36.1787	6.32558
	43	42.7152	16.2492	35.5412	--	37.4703				--							43	32.994	5.78371
	44	47.4814	18.3264	34.5904	--	49.4955				--							44	37.4734	7.18569
	45	33.4006	14.1378	38.1354	--	26.6815				--							45	28.0888	5.21025
	46	46.4174	16.3156	30.5515	--	32.4681				--							46	31.4382	6.15709
	47	47.1842	14.7819	33.4651	--	38.0218				--							47	33.3633	6.81908
	48	50.4275	13.3772	34.7098	--	33.3135				--							48	32.957	7.59268
	49	51.4838	16.3183	26.802	--	35.7863				--							49	32.5976	7.44682
	50	52.3984	13.3081	30.5486	--	52.8544				--							50	37.2774	9.53542
	51	58.3904	13.6996	40.7996	--	32.8207				--							51	36.4276	9.26935
	52	51.5958	13.0159	31.8268	--	21.998				--							52	29.6091	8.27444
	53	52.7531	16.3124	34.2676	--	26.8578				--							53	32.5477	7.67668
	54	46.7969	17.7276	40.7012	--	40.2596											54	36.3713	6.39106
	55	57.415	19.1041	37.4619	--	46.4847											55	40.1164	8.10535
	56	52.8915	19.8108	29.8427	--	19.7263											56	30.5678	7.81091
	57	45.2569		29.9783	--	23.5238											57	32.9197	6.44388
	58	35.947		37.4648	--	8.13736											58	27.1831	9.53292
	59			35.2371	--	27.4184
	60			27.4421	--	36.3175

## Sheet: sample of gfp
	120 s bin
		8-1-2018-n2		8-30-2018-n2
		83.7729		110.053		95.4141
		83.1769		90.3905		102.522
		96.2852		130.503		114.189
		109.492		105.854		105.132
		114.65		102.981		92.3228
		107.409		112.277		114.929
		111.749		99.8345		82.6621
		104.616		76.7723		90.2847
		111.094		96.6416		83.5271
		115.75		82.7764		88.8881
		116.046		98.1348		90.5545
		106.165		92.8557		87.8334
		99.7618		89.8636		89.6849
		101.42		80.8269		68.2271
		95.7446		77.2356		75.8462
		99.8244		67.0512		59.8762
		98.1349		71.5641		71.7446
		89.1998		61.0859		57.6893
		97.8235		58.4284		51.2053
		87.6641		42.922		43.5179
		76.9119		47.2282		32.9336
		50.6574		36.4098		40.8825
		51.4082		43.218		44.7649
		46.4912		47.7156		49.9391
		50.5857		58.3266		49.6656
		43.0793		52.3131		51.7695
		-20.9782		48.2114		50.6218
		24.6757		22.8314		31.6063
		54.986		24.1825		43.8069
		56.9504		40.272		32.8059
		43.5346		38.1104		33.1131
		45.0952		33.3979		52.3602
		51.2776		41.6191		44.3082
		55.9587		51.8955		39.5215
		56.6622		41.8812		49.7531
		46.2807		45.8019		44.342
		48.5228		45.4738		51.7139
		49.7816		55.2025		30.7156
		46.5525		31.7559		37.9162
		50.2863		5.93899		44.0849
		50.7926		32.8681		48.0339
		51.0801		41.7379		41.8479
		53.9258		49.7716		37.5234
		46.2844		43.8006		37.5024
		104.632		42.5439		28.8096
				42.5025		24.815
				31.5719		31.4841
				27.2402		31.9427
				32.3468		29.1058
				30.7574		32.9272
				30.6169		37.7558
				31.3664		17.0784
				36.8812		Inf
				30.1861
				16.55
