# Supplementary material for: Synaptic memory requires CaMKII
Source: eLife. 2021 Dec 15;10:e60360. doi: 10.7554/eLife.60360 (PMC8798046; doi:10.7554/eLife.60360)
Supplement: Figure 4—source data 1. — In this dataset, the results of the effects of myr-CN27 and paAIP2 on AMPAR EPSCs over time are included. [file elife-60360-fig4-data1.xlsx]

## Sheet: Sheet1
		12-27-2019-n1
		66.3081	1
		82.2362	2
		84.3235	3
		99.0471	4
		100.169	5
		126.979	6
		157.992	7
		90.9881	8
		92.2945	9
		98.2154	10
		92.2295	11
		97.4657	12
		97.6422	13
		72.9245	14
		79.3135	15
		77.2938	16
		70.3213	17
		64.6847	18
		73.5689	19
		51.3179	20
		93.6571	21
		82.2495	22
		70.8655	23
		49.707	24
		46.7588	25
		30.9392	26
		18.119	27
		35.3545	28
		80.5804	29
		67.6418	30
		96.9373	31
		60.6683	32
		48.4599	33
		37.9287	34
		30.4449	35
		33.5074	36
		20.3292	37
		25.9852	38
		36.6983	39
		26.8342	40
		33.7256	41
		161.318	42
		39.4112	43
		11.9771	44
		43.5305	45
		Inf	47

## Sheet: CON
		12-27-2019-N1	12-26-2019-N5	12-26-2019-N4	12-24-2019-N5	12-23-2019-N1
		66.3081	65.3159	163.292	64.6793	105.02
		82.2362	72.5999	171.199	81.5723	107.924
		84.3235	76.2128	149.352	121.062	132.628
		99.0471	74.2078	154.951	120.063	147.179
		100.169	76.4638	158.054	89.479	140.997
		106.979	82.6683	154.187	120.877	101.897
		107.992	93.421	129.431	92.4163	128.618
		90.9881	96.3153	166.445	90.0828	119.438
		92.2945	93.0864	144.023	114.854	128.196
		98.2154	93.1765	128.862	135.095	121.591
		92.2295	111.079	141.614	160.644	127.928
		97.4657	102.039	133.992	95.2127	86.9769
		97.6422	103.916	170.52	96.1235	71.6432
		72.9245	105.962	149.925	125.642	77.7475
		79.3135	105.771	149.256	76.6995	67.5266
		77.2938	89.0264	111	82.15	76.7415
		70.3213	108.227	125.348	69.7904	89.5625
		64.6847	82.435	134.823	56.2843	76.6588
		73.5689	103.152	143.416	73.9056	92.9257
		51.3179	111.487	111.886	70.0739	70.467
		93.6571	106.661	119.816	52.3029	54.312
		82.2495	117.682	106.265	58.2995	63.3275
		70.8655	91.7531	90.0777	69.6209	29.1851
		49.707	90.8757	76.9827	98.0242	18.8913
		46.7588	68.7938	107.208	61.1551	39.1921
		30.9392	48.3089	79.5212	47.2975	19.9509
		18.119	64.1397	46.2334	83.9629	28.3297
		35.3545	69.1605	42.8655	40.1461	35.581
		70.5804	38.0174	34.8868	48.3945	14.5853
		67.6418	58.4102	30.1149	42.2267	2.36789
		76.9373	31.1728
		60.6683	31.1906
		48.4599	25.4888
		37.9287	32.9739
		30.4449	27.5357
		33.5074	34.4836
		20.3292	30.4416
		25.9852	16.5572
		36.6983	24.2609
		26.8342	17.0431
		33.7256	33.0248
		39.4112	18.347
		11.9771	12.7141
		43.5305	37.1283
			36.8999
			34.2986
			31.567
			22.4357
			24.588
			38.1947
			52.2841
			29.1597
			53.4467
			30.359
			15.6687
			24.3409

## Sheet: GLUn1
		12-27-2019-n2	12-27-2019-n5	12-24-2019-n5	12-23-2019-n8	12-23-2019-n7
		84.8358	73.4356	56.6473	133.644	126.783					82.0668	144.772	56.6473	133.644	181.071
		58.1524	125.217	89.6423	143.459	164.655					91.4966	202.823	89.6423	143.459	210.764
		72.2163	98.4644	106.861	118.112	104.131					61.6637	153.537	106.861	118.112	160.423
		70.8654	99.3909	149.894	116.545	112.981					72.4037	249.434	149.894	116.545	221.598
		97.928	147.011	121.944	89.8747	94.5383					77.1574	160.718	121.944	89.8747	268.179
		103.633	111.909	111.653	84.8534	112.704					90.022	214.49	111.653	84.8534	257.384
		102.369	158.179	102.258	65.033	98.9651					71.035	172.292	102.258	65.033	189.523
		82.9707	194.024	90.29	80.9205	118.531					90.5843	171.761	90.29	80.9205	212.569
		82.0668	112.354	76.0173	88.7637	181.071					95.1308	157.108	76.0173	88.7637	289.643
		91.4966	178.675	82.7807	71.1999	210.764					85.3937	197.811	82.7807	71.1999	357.378
		61.6637	173.115	78.6677	92.0542	160.423					75.8029	213.514	78.6677	92.0542	295.656
		72.4037	231.095	80.4724	116.053	221.598					72.8617	116.538	80.4724	116.053	281.162
		77.1574	176.775	79.9281	160.23	268.179					51.1991	138.901	79.9281	160.23	290.539
		90.022	175.766	75.5572	147.682	257.384					73.9787	120.334	75.5572	147.682	283.525
		71.035	152.198	71.2766	131.119	189.523					100.172	270.931	71.2766	131.119	384.549
		90.5843	256.607	86.4364	112.306	212.569					101.382	176.514	86.4364	112.306	207.179
		95.1308	285.173	84.5851	125.048	289.643					70.0004	216.181	84.5851	125.048	310.07
		85.3937	159.98	54.3852	129.307	357.378					76.7626	215.897	54.3852	129.307	246.695
		75.8029	251.164	71.3805	116.585	295.656					101.32	151.893	71.3805	116.585	290.028
		72.8617	212.225	61.0697	118.91	281.162					101.025	109.115	61.0697	118.91	266.286
		51.1991	177.86	73.3825	116.629	290.539					98.4606	223.996	73.3825	116.629	220.191
		73.9787	226.66	73.7059	127.21	283.525					73.6532	158.281	73.7059	127.21	221.977
		100.172	150.079	69.9476	127.847	384.549					100.021	146.042	69.9476	127.847	237.32
		101.382	228.512	88.5504	135.521	207.179					74.214	198.706	88.5504	135.521	222.66
		70.0004	314.131	78.3621	123.504	310.07					102.25	163.973	78.3621	123.504	277.739
		76.7626	144.772	72.7685	120.602	246.695					87.5642	218.854	72.7685	120.602	226.318
		101.32	202.823	83.3375	116.102	290.028					103.172	204.974	83.3375	116.102	347.394
		101.025	153.537	85.2534	93.8469	266.286					107.434	180.835	85.2534	93.8469	293.401
		98.4606	249.434	94.6856	113.167	220.191					97.6699	217.608	94.6856	113.167	275.774
		73.6532	160.718	79.4685	87.8165	221.977					108.538	149.298	79.4685	87.8165	244.58
		100.021	214.49	96.8607	114.878	237.32					85.3283	116.141	96.8607	114.878	421.681
		74.214	172.292		108.601	222.66					87.6137	149.007
		102.25	171.761		100.488	277.739						209.822
		87.5642	157.108		72.7027	226.318						101.846
		103.172	197.811		110.971	347.394						118.197
		107.434	213.514			293.401						249.744
		97.6699	116.538			275.774
		108.538	138.901			244.58
		85.3283	120.334			421.681
		87.6137	270.931
			176.514
			216.181
			215.897
			151.893
			109.115
			223.996
			158.281
			146.042
			198.706
			163.973
			218.854
			204.974
			180.835
			217.608
			149.298
			116.141
			149.007
			209.822
			101.846
			118.197
			249.744

## Sheet: SUMA
							MEAN		GLUN1
							CON	SE			MEAN	SE
							92.9231	19.1916	1	1	90.0358	12.3471
							103.106	18.0135	2	2	109.771	8.58326
							112.716	14.0481	3	3	90.6228	7.52345
							119.09	14.9868	4	4	117.517	9.9445
							113.033	15.5988	5	5	102.915	8.06658
							113.322	11.911	6	6	108.037	6.97238
							110.376	8.09805	7	7	86.6664	6.29
							112.654	14.466	8	8	94.4348	6.0838
							114.491	10.0273	9	9	99.9838	11.8934
							115.388	8.35656	10	10	106.265	17.2432
							126.699	11.8498	11	11	102.974	11.1274
							103.137	8.09118	12	12	95.2763	12.1778
							107.969	16.5765	13	13	101.532	18.2097
							106.44	14.5025	14	14	101.323	15.5443
							95.7133	14.8205	15	15	129.792	18.2589
							87.2423	6.33554	16	16	102.449	7.36091
							92.6498	10.8224	17	17	110.645	11.6861
							82.9772	13.7392	18	18	101.345	13.0641
							97.3936	12.8267	19	19	105.461	12.9154
							83.0464	12.1939	20	20	96.9549	15.5848
							85.3498	13.7232	21	21	106.419	9.61855
							85.5647	11.6381	22	22	95.2926	8.61642
							70.3005	11.2752	23	23	101.429	11.8037
							66.8962	14.5699	24	24	104.36	7.63234
							64.6216	11.8507	25	25	108.531	11.058
							45.2035	10.0819	26	26	104.341	8.81546
							48.1569	11.9093	27	27	119.314	13.5635
							44.6215	6.29636	28	28	108.772	11.613
							41.2929	9.14673	29	29	114.196	6.64131
							40.1523	11.4493	30	30	98.7506	11.5832
									31	31	114.517	22.5374
									32	32	95.6167	14.5149
									33	33	114.202	0
