# Supplementary material for: Synaptic memory requires CaMKII
Source: eLife. 2021 Dec 15;10:e60360. doi: 10.7554/eLife.60360 (PMC8798046; doi:10.7554/eLife.60360)
Supplement: Figure 5—source data 1. — In this dataset, the results of the effects of LTP induction on control cells and preinhibition cells are included. [file elife-60360-fig5-data1.xlsx]

## Sheet: GFP
																	NORmalied first					2nd n=5
													MEAN		SE			mean	se					m	se
	88.2199	114.815	97.1773	79.9519		108.633							95.041	14.9419	7.47096		1	92.1804	5.20375				1	97.7595	6.39367
	104.996	109.651	105.497	105.261		92.8293							106.351	2.20941	1.10471		2	103.601	1.56644				2	103.647	2.83652
	106.784	108.095	97.3257	115.543		98.5375							106.937	7.47896	3.73948		3	104.219	4.28982				3	105.257	3.34848
	--		--	--		--							0	0	0		4	0	0				4	0	0
	--	--	--	--		--							0	0	0		5	0	0				5	0	0
	127.404	156.218	126.445	154.417		199.935							141.121	16.4136	8.20681		6	137.2	6.51079				6	152.884	13.3707
	110.429	165.039	138.19	188.724		252.616							150.595	33.8116	16.9058		7	146.437	16.1216				7	170.999	24.2448
	122.186	161.643	156.439	177.995		483.871							154.566	23.459	11.7295		8	150.497	11.5125				8	220.427	66.4847
	129.357	147.48	175.679	176.925		550.539							157.36	23.095	11.5475		9	153.639	12.9788				9	235.996	79.1428
	149.971	151.125	181.304	200.996		654.041							170.849	24.7862	12.3931		10	167.024	14.5973				10	267.487	97.114
	155.395	185.395	192.831	196.617		448.645							182.56	18.6998	9.34989		11	177.898	9.89542				11	235.777	53.7077
	148.848	201.758	185.525	188.335		558.832							181.116	22.6487	11.3244		12	176.059	9.15018				12	256.66	76.0508
	166.305	176.459	167.481	223.738		514.818							183.496	27.2087	13.6043		13	179.036	14.827				13	249.76	67.097
	181.382	213.451	187.87	271.249		461.809							213.488	40.9204	20.4602		14	208.093	20.9504				14	263.152	52.1316
	190.013	195.695	193.595	250.598		530.181							207.475	28.844	14.422		15	202.528	16.2344				15	272.016	65.5009
	186.287	188.722	194.965	238.161		504.186							202.034	24.3605	12.1803		16	197.265	14.3753				16	262.464	61.1625
	226.431	205.519	174.085	252.866		510.32							214.725	33.3075	16.6537		17	209.536	18.1378				17	273.844	60.51
	219.085	224.451	198.833	267.052		415.579							227.355	28.6715	14.3358		18	221.693	15.5341				18	265	39.2484
	203.988	241.127	187.108	272.923		542.753							226.287	38.4159	19.2079		19	220.213	18.4231				19	289.58	65.0185
	209.926	230.128	192.19	296.927		503.044							232.293	45.7921	22.8961		20	226.473	23.5666				20	286.443	56.9807
	225.968	188.801	185.54	286.572		505.671							221.72	46.9627	23.4813		21	216.919	25.804				21	278.51	59.6317
	243.46	252.486	185.42	297.868		485.095							244.809	46.1989	23.0995		22	238.441	23.0823				22	292.866	51.2801
	226.799	221.462	181.262	327.68		481.615							239.301	62.3269	31.1635		23	233.674	32.4373				23	287.764	54.1419
	221.13	202.683	191.37	316.512		537.307							232.924	57.0594	28.5297		24	227.764	30.4446				24	293.8	64.7637
	245.643	228.819	179.762	340.508		601.252							248.683	67.2949	33.6475		25	242.868	34.9834				25	319.197	75.1764
	240.957	197.569	189.405	329.863		521.888							239.449	64.3825	32.1912		26	234.405	34.3739				26	295.936	61.7467
	241.741	231.287	196.846	347.919		482.976							254.448	65.1991	32.5996		27	248.568	34.173				27	300.154	52.2172
	246.954	177.812	188.064	341.655		454.642							238.621	75.1426	37.5713		28	234.054	39.8957				28	281.825	52.0919
	230.219	173.791	183.035	337.931		527.596							231.244	75.2953	37.6477		29	226.778	39.7834				29	290.514	66.0559
	226.458		185.314	333.32		529.095							248.364	76.3958	44.1072		30	248.085	43.8383				30	318.547	76.8007
	233.629		178.143	323.16		509.316							244.977	73.1714	42.2455		31	244.707	41.9951				31	311.062	72.5227
	219.467		197.053			446.499																	32	287.673	79.676
	212.396		176.243			448.892
	233.229		186.108			500.142
	226.683		181.321			468.383
	232.29		177.093			473.65
	233.505					467.915
	208.99					451.273
	202.338					531.09
	217.528					--
	221.305					--
	219.532					--
	230.966
	239.516
	243.156
	234.887
	259.848
	231.298
	243.352
	219.821
	204.885
	208.673
	386.499

## Sheet: CON
																			normalied							2nd n=5
														MEAN		SE					mean		se				m		se
		107.534	124.906	100.246	92.8034		104.567							106.372	13.7416	6.87082				1	103.29	6.5894	3.2947			1	106.011	11.928	5.33435
		103.497	115.973	102.639	89.9987		96.0629							103.027	10.6098	5.30492				2	100.193	5.06531	2.53265			2	101.634	9.70186	4.3388
		88.9691	100.268	97.1151	108.606		99.3703							98.7395	8.1196	4.0598				3	96.5167	10.9658	5.48292			3	98.8657	7.03744	3.14724
		--		--	--		--							0	0	0				4	0	0	0			4	0	0	0
		--	--	--	--		--							0	0	0				5	0	0	0			5	0	0	0
		128.695	98.9773	129.916	127.604		90.3265							121.298	14.9106	7.45528				6	119.254	21.5044	10.7522			6	115.104	18.9366	8.46869
		133.979	124.453	149.801	146.417		96.8962							138.662	11.6626	5.83131				7	135.989	19.2956	9.6478			7	130.309	21.2343	9.49627
		114.159	134.363	141.447	163.478		94.988							138.362	20.3479	10.1739				8	135.515	24.9486	12.4743			8	129.687	26.2065	11.7199
		132.946	141.527	138.53	173.752		159.694							146.689	18.3893	9.19466				9	143.702	24.152	12.076			9	149.29	16.9544	7.58223
		167.627	135.57	130.207	199.107		152.009							158.128	31.9269	15.9634				10	155.507	38.9495	19.4748			10	156.904	27.7846	12.4256
		168.55	150.067	136.636	197.029		182.014							163.07	26.1475	13.0737				11	159.998	32.8631	16.4315			11	166.859	24.1772	10.8124
		177.713	156.216	140.662	181.771		202.453							164.091	19.2272	9.61358				12	160.72	25.3876	12.6938			12	171.763	23.9081	10.692
		177.364	153.509	117.463	184.985		256.363							158.33	30.3652	15.1826				13	155.065	34.4738	17.2369			13	177.937	51.1235	22.8631
		159.567	147.622	139.532	224.673		228.952							167.849	38.7664	19.3832				14	165.053	45.8668	22.9334			14	180.069	43.2879	19.3589
		171.07	161.626	123.649	214.057		278.082							167.601	37.1378	18.5689				15	164.305	42.1639	21.082			15	189.697	58.9546	26.3653
		146.112	148.258	136.335	205.647		245.261							159.088	31.4701	15.735				16	156.133	37.6149	18.8074			16	176.323	47.2011	21.109
		135.039	147.849	128.936	211.693		239.788							155.879	38.0347	19.0174				17	152.981	43.3837	21.6918			17	172.661	49.9312	22.3299
		170.578	136.667	151.968	200.552		225.287							164.941	27.4932	13.7466				18	162.299	36.0539	18.027			18	177.011	35.9892	16.0949
		140.556	150.97	120.33	210.645		204.638							155.625	38.8232	19.4116				19	152.626	43.6227	21.8114			19	165.428	40.1357	17.9492
		136.719	128.95	143.988	208.408		215.857							154.516	36.4489	18.2245				20	152.164	43.5916	21.7958			20	166.785	41.8203	18.7026
		127.65	160.337	130.848	224.686		217.257							160.88	45.0099	22.505				21	157.702	49.4015	24.7008			21	172.156	46.4229	20.761
		144.99	122.529	121.159	227.551		256.559							154.057	50.1994	25.0997				22	152.04	56.936	28.468			22	174.558	63.1769	28.2536
		121.223	160.798	131.57	227.454		246.621							160.261	47.8272	23.9136				23	157.089	52.0371	26.0186			23	177.533	56.6318	25.3265
		108.074	117.181	117.229	224.409		223.947							141.723	55.2918	27.6459				24	139.844	61.0707	30.5353			24	158.168	60.374	27.0001
		132.981	136.419	129.541	220.872		229.182							154.953	44.0353	22.0177				25	152.468	50.2469	25.1234			25	169.799	50.5599	22.6111
		106.867	143.05	127.765	216.776		184.233							148.614	47.7998	23.8999				26	145.899	52.3668	26.1834			26	155.738	44.3549	19.8361
		118.714	129.138	118.262	217.448		215.699							145.89	47.9688	23.9844				27	143.599	53.5573	26.7786			27	159.852	51.9654	23.2396
		111.527	119.402	111.727	206.299		247.374							137.239	46.1857	23.0928				28	135.159	51.5762	25.7881			28	159.266	63.449	28.3753
		110.334	123.068	125.335	213.884		219.896							143.155	47.6124	23.8062				29	141.021	53.3263	26.6632			29	158.503	53.6475	23.9919
		111.68		126.338	223.832		173.349							153.95	60.9617	35.1962				30	156.15	64.7459	37.3811			30	158.8	50.7113	25.3556
		111.848		124.322	218.001		225.351							151.39	58.0226	33.4994				31	153.533	61.7134	35.6302			31	169.88	60.0994	30.0497
		117.336		140.874			169.066																			32	142.426	25.8996	14.9532
		111.635		117.045			206.172
		147.789		138.444			160.842
		122.643		130.904			145.293
		129.603		115.861			140.903
		155.982					121.286
		129.314					138.289
		127.056					131.194
		125.162					126.177
		126.426					156.149
		128.22					--
		148.602
		115.833
		93.7193
		111.708
		83.7696
		92.6753
		90.1679
		78.5702
		84.3327
		81.7059
		162.249

## Sheet: stacis-30 min
	30 min	con	118.714	129.138	118.262	217.448	215.699
		gfp	241.741	231.287	196.846	347.919	482.976
								p
								0.0131444
