# Supplementary material for: Synaptic memory requires CaMKII
Source: eLife. 2021 Dec 15;10:e60360. doi: 10.7554/eLife.60360 (PMC8798046; doi:10.7554/eLife.60360)
Supplement: Figure 6—source data 1. — In this dataset, the results of the effects of myr-CN27 on LTP and control pathways are included. [file elife-60360-fig6-data1.xlsx]

## Sheet: ltp baseline
	1	96.9254	96.7679	74.0472	84.4712	108.444	96.7679	89.9917	65.0487	90.5095	93.4452		91.3131
	2	104.679	103.673	112.11	100.089	83.4784	103.673	101.259	103.09	103.879	96.4337		104.358
	3	98.396	99.5587	113.843	115.44	108.077	99.5587	108.749	131.861	105.611	110.121		104.329

## Sheet: 6 potins
	6	82.8624	174.838	134.742	122.999	126.781	276.664	227.882	172.947	165.373	151.647		310.834
	7	94.2001	149.793	174.104	146.936	112.196	273.15	149.183	248.891	161.088	142.271		365.57
	8	116.892	153.795	207.931	141.371	136.787	288.894	183.876	279.893	144.53	141.789		372.173
	9	155.02	144.059	258.158	167.408	101.52	290.703	257.588	400.963	152.408	157.284		380.091
	10	149.268	131.492	242.862	165.082	82.2584	291.771	505.416	391.64	164.713	173.872		395.832
	11	144.011	159.357	254.293	160.816	62.1966	267.905	431.8	477.387	180.504	153.642		403.324

## Sheet: the rest
	12	159.904	160.525	240.619	175.597	248.932		284.558	835.241	283.44	151.084	181.103		406.645
	13	199.604	126.827	225.803	181.789	235.258		263.714	749.895	342.982	177.848	145.885		411.215
	14	206.026	130.659	248.681	179.234	196.538		267.937	662.826	473.222	144.807	151.103		415.608
	15	199.315	124.643	223.69	184.354	323.227		280.833	535.196	464.155	171.22	147.642		412.948
	16	220.676	137.653	233.437	175.869	297.407		271.602	568.434	526.203	192.21	138.848		406.42
	17	197.543	179.688	216.716	154.215	231.77		273.76	511.237	484.639	191.599	152.4		401.254
	18	190.66	166.698	215.512	155.176	290.76		267.365	656.606	425.409	181.957	155.765		401.023
	19	208.517	162.927	227.625	170.062	293.197		266.677	574.049	443.899	183.594	159.876		399.466
	20	202.372	148.642	220.013	183.097	267.031		246.498	646.475	490.478	168.731	161.209		402.083
	21	199.925	153.017	229.93	167.487	255.789		238.546	772.483	336.62	188.125	156.578		405.218
	22	200.222	182.168	233.979	163.348	221.107		222.144	725.794	362.573	160.093	164.984		410.356
	23	163.894	195.508	233.286	166.995	247.609		221.97	704.563	345.117	165.931	174.41		411.064
	24	190.007	150.597	211.773	167.423	267.32		220.651	641.899	405.357	176.111	168.068		413.196
	25	157.817	163.212	200.446	159.379	339.254		233.075	746.079	371.237	157.218	166.748		402.766
	26	162.134	203.483	184.084	159.004	345.858		219.644	753.647	382.638	165.799	168.628		399.657
	27	161.893	185.518	222.954	166.633	323.256		215.381	680.59	395.183	159.847	189.666		396.075
	28	161.926	173.387	235.758	155.119	305.219		203.258	573.878	421.896	150.346	180.957		386.016
	29	164.744	163.77	232.102	152.137	248.828		179.169	474.302	476.694	178.275	189.65		370.323
	30	131.482	150.927	204.237	150.387	234.846		218.9	448.533	435.341	187.394	185.843		362.371
	31	126.771	186.463	200.986	147.728	214.576		196.867	442.113	309.199	188.714	165.062		357.438
	32	151.792	167.496	196.23	157.284	185.013		224.605	420.305	229.546	179.016	177.259		354.005
	33	174.178	146.956	168.577	130.441	226.312		221.193	429.704	278.144	166.739	179.886		353.116
	34	165.064	153.825	165.08	137.763	180.694		190.259	440.405	361.5	187.847	158.819		346.854
	35	176.524	151.426	185.601	125.19	157.053		196.495	403.258	238.834	173.183	141.554		353.589
	36	149.548	141.292	148.502	123.998	153.336		188.733	401.259	173.373	161.867	134.535		363.814
	37	136.417	127.663	121.714	122.785	148.017		183.371	365.31	185.897	154.802	119.096		370.663
	38	144.963	127.964	114.471	119.356	143.649		151.226	403.361	205.521	154.208	104.448		367.112
	39	145.735	113.416	70.8699	116.871	191.521		155.832	300.822	205.839	168.701	99.1567		365.131
	40	131.729	97.8576	60.8237	113.883	157.46		126.507	352.216	175.213	161.43	99.1259		361.358
	41	140.709	113.307	65.253	121.662	123.453		127.454	266.213	184.204	155.896	117.116		364.767
	42	115.542	85.554	55.764	117.128	175.954		105.547	201.068	136.724	158.639	114.4		359.032
	43	104.528	82.6868	63.6843	113.82	118.346		100.098	244.694	124.134	149.643	93.8953		359.101
	44	105.052	93.6049	61.4164	113.215	103.538		97.0133	264.585	103.978	144.082	88.6919		347.009
	45	99.3394	104.192	63.4453	110.282	94.3229		90.6052	281.799	72.8984	157.247	86.6563		338.778
	46	85.9742	94.9462	61.2319	107.818	100.322		99.2171	189.764	72.0893	128.456	83.7754		335.01
	47	100.205	93.7895	53.9551	103.141	79.3403		89.5592	201.404	59.0563	130.244	73.7265		326.793
	48	73.6249	85.6992	43.6132	101.694	71.0883		83.6233	240.481	67.8271	140.264	70.2112		318.742
	49	75.1958	96.6741	56.7861	104.498	47.9446		61.1262	237.419	--	136.55	82.4642		305.577
	50	85.4463	88.328	43.6215	100.605	31.915		--	210.484	--	142.533	66.9656		284.906
	51	83.6457	104.681	45.7059	87.917	41.8129		--	188.221	--	117.164	60.8601		273.378
	52	69.838	93.679	37.7749	90.4602	34.4133		--	230.934	--	123.019	61.6198		266.242
	53	80.7467	89.4642	43.0583	83.3333	25.607		--	202.888	--	132.294	58.2193		253.981
	54	55.0021	84.2695	39.8015	73.928	19.0947		--	210.469	--	118.004	55.0823		240.971
	55	63.2112	91.8549	43.0548	82.9502	17.1156		--	204.781	--	117.907	49.6944		220.978
	56	56.2281	74.7353	40.8154	77.3538	21.4824		--	212.007	--	123.999	54.683		204.756
	57	42.5093	76.591	32.9554	72.5406	8.98541		--	155.295	--	119.848	52.2964		190.433
	58	49.5981	79.5766	37.6259	73.8053	8.87205		--	149.065	--	115.268	50.2034		179.721
	59	48.4612	82.3759	39.5981	61.1769	11.8238		--	146.993	--	114.618	39.0179		162.815
	60	47.5338	75.0114	41.7192	65.4831	0.80757		--	147.344	--	122.37	40.1402		146.763
	61	56.9575	64.5572	55.4552	60.3733	-7.73977		--	140.475	--	106.859	44.9204		128.231
	62	45.3524	63.3864	51.304	60.3627	-1.52556		--	66.1944	--	111.982	44.2417		112.111
	63	40.4896	61.6537	38.4446	70.5545	6.35136		--	67.506	--	112.582	36.2499		99.9121
	64	45.0901	54.5496	43.4275	61.9271	-3.21348		--	65.3118	--	117.676	32.5058		90.9169
	65	36.3942	48.6606	41.1679	77.215	-5.11971		--	94.9192	--	128.249	43.007		81.0429
	66	37.6713	51.0891	37.2131	68.7584	-9.86574		--	115.651	--	104.887	35.523		75.914
	67	32.8399	51.8685	37.8697	75.1094	-8.36819		--	102.71	--	124.759	36.2074		71.4819
	68	37.6713	49.4621	34.7583	67.8299	-4.75442		--	111.943	--	116.34	44.8402		69.485
	69	42.9433	48.2803	27.7962	59.4854	-10.1429		--	102.946	--	101.309	42.3548		69.0653
	70	33.7062	47.1914	26.7646	60.9549	-11.2443		--	55.9209	--	121.237	39.1549		67.6382
	71	26.8253	64.3316	35.7639	49.667			--	129.82	--	106.933	40.4889		65.342
	72	25.1852	57.8145	31.356	48.9189			--	--	--	127.294	37.3816
	73	23.8008	59.9494	33.7776	48.0256			--	--	--	120.994	40.2082
	74	24.5977	60.7653	27.8128	42.2147			--	--	--	113.162	34.529
	75	24.7578	58.3273	29.2542	48.8399			--	--	--	109.217	--
	76	26.69	63.6183	--	46.2797			--	--	--	100.233	--
	77	24.5235	54.9725	--	49.7012			--	--	--	111.439	--
	78	19.8488	52.4682	--	49.572			--	--	--	104.909	--
	79	24.0318	63.8424	--	52.0042			--	--	--	94.8978	--
	80	20.3653	67.8205	--	--			--	--	--	84.0661	--
	81	31.5858	58.8685	--	--			--	--	--	104.863	--
	82	27.5811	61.4517	--	--			--	--	--	98.8861	--
	83	21.6837	56.7761	--	--			--	--	--	102.542	--
	84	32.2095	55.9145	--	--			--	--	--	112.536	--
	85	30.8812	70.3579	--	--			--	--	--	103.943	--
	86
	87
	88
	89
	90

## Sheet: control pathwy
1	96.9254	96.7679	74.0472	84.4712		96.7679	89.9917	65.0487	90.5095	93.4452		108.444		120.55
2	104.679	103.673	112.11	100.089		103.673	101.259	103.09	103.879	96.4337		83.4784		97.1945
3	98.396	99.5587	113.843	115.44		99.5587	108.749	131.861	105.611	110.121		108.077		82.2557
4	--	--	--	--		--	--	--	--	--		--		--
5	--	--	--	--		--	--	--	--	--		--		--
6	69.5355	44.2831	99.7256	92.4636		120.889	95.9384	164.182	75.9279	102.062		71.9057		83.3112
7	64.2124	66.4638	108.046	88.9933		104.118	64.8793	126.554	87.5673	100.901		65.7715		82.4311
8	76.9959	73.6435	107.503	92.3831		100.779	74.2242	98.3628	81.5554	110.391		57.2159		89.5279
9	80.2768	73.7013	105.29	89.4979		106.656	103.914	99.6604	82.3101	102.162		49.2531		91.5696
10	90.5038	72.2077	100.137	95.6772		103.246	84.7674	151.354	83.1382	105.567		51.6776		90.068
11	86.1176	69.1588	98.3176	103.57		103.315	99.0316	98.4324	94.3901	107.788		53.8978		89.6004
12	95.0888	94.8753	89.4175	96.0783		97.7817	101.026	112.569	87.2754	92.6925		63.0656		88.7201
13	103.861	93.8281	95.051	101.557		121.966	69.2104	71.2323	93.1195	95.7283		79.9472		89.4413
14	112.989	115.814	88.0265	103.088		96.5991	98.1187	75.4867	91.9953	113.033		75.9397		89.6535
15	106.036	104.814	82.6085	104.722		101.134	65.0253	116.885	94.708	104.869		86.2503		90.381
16	110.892	100.981	84.4751	96.9258		90.9005	82.1672	80.3728	90.9747	106.443		94.2896		86.8391
17	112.632	120.889	103.216	101.161		108.664	93.2287	91.8076	91.4301	105.285		92.7442		84.4029
18	104.36	104.118	95.7448	98.4834		108.133	79.0448	91.1976	92.6793	104.827		101.311		81.1149
19	109.387	100.779	83.8448	99.1363		114.466	95.6062	118.656	91.9274	92.7236		86.9441		81.8127
20	113.36	106.656	84.4595	96.7211		96.8364	62.0382	77.6632	84.7935	107.058		108.501		86.2124
21	103.176	103.246	96.2647	97.1356		88.8234	75.5864	100.727	91.5953	97.2486		103.699		87.1825
22	103.101	103.315	92.7089	87.8912		104.665	70.2658	81.5876	80.2952	100.904		96.2442		83.6961
23	93.0797	97.7817	87.8066	91.5786		102.326	89.4271	87.6851	81.6656	103.674		90.7949		84.6372
24	93.3886	121.966	87.8365	95.7667		110.686	83.8435	77.9047	90.5631	97.419		101.135		84.9031
25	87.9702	96.5991	88.5119	88.7232		107.875	91.2969	142.872	82.054	103.222		111.223		86.2896
26	81.1686	101.134	95.4698	89.715		97.2334	106.916	128.436	77.903	98.5775		109.747		83.7194
27	78.261	90.9005	89.8699	90.3449		113.757	101.362	172.448	82.4607	97.3399		127.518		82.9181
28	75.0525	108.664	91.7082	95.2519		100.586	72.1246	151.223	88.4801	90.9545		104.803		80.6328
29	76.1128	108.133	96.2576	87.593		85.2844	84.4022	139.131	84.2619	105.22		96.9473		74.2836
30	75.0062	114.466	90.4386	95.0579		92.8652	86.2098	130.428	94.8776	90.8334		102.595		72.9285
31	75.5045	96.8364	86.2505	103.529		88.9276	77.6644	143.244	95.5464	86.6398		102.843		71.4918
32	78.4443	88.8234	92.4241	107.39		96.1792	73.9542	127.037	92.882	79.0939		89.0181		67.6678
33	79.228	104.665	91.5627	91.8157		89.2174	65.847	165.53	85.9462	79.9522		95.4829		65.7587
34	80.1325	102.326	82.5199	109.422		86.2615	75.1629	117.305	102.133	66.946		80.9356		63.8885
35	77.8735	110.686	83.8798	107.06		90.1361	74.3047	107.499	98.8395	70.1116		121.14		63.5848
36	76.3835	107.875	89.4219	109.378		91.2663	61.5889	123.659	100.043	58.7156		117.716		66.1167
37	75.5797	97.2334	84.0878	108.085		93.9371	58.4629	114.906	93.3222	51.6093		127.218		66.4435
38	61.5877	113.757	78.6274	99.7679		77.0205	65.3979	107.367	90.8809	44.5389		135.421		68.7512
39	69.8517	100.586	74.1571	101.343		79.4787	59.2955	102.094	92.2855	42.9558		127.957		66.3845
40	60.9836	85.2844	70.4146	102.525		56.6163	68.4764	85.5471	95.9161	40.0829		124.613		68.13
41	63.3076	92.8652	67.5447	103.764		53.1283	87.6267	100.919	92.3373	40.6848		108.813		71.0487
42	53.6688	88.9276	66.331	99.9727		59.2576	52.5614	94.2615	97.1349	35.4782		105.802		74.0595
43	56.4308	96.1792	62.5072	105.734		42.9824	66.0954	97.3929	89.2653	39.0225		114.641		78.1252
44	58.5323	89.2174	70.0348	100.106		52.5467	47.9674	109.531	89.7612	32.1434		129.1		76.071
45	58.9211	86.2615	68.6011	96.8878		47.8322	80.7101	95.4554	86.2319	31.4848		114.803		74.512
46	52.8508	90.1361	69.9579	94.6522		48.1906	58.9486	122.128	87.4192	33.0165		127.881		75.8602
47	54.9147	91.2663	66.6695	97.0349		47.8111	76.7295	99.2611	84.9675	28.7452		112.112		74.3625
48	51.4966	93.9371	66.9587	91.4689		42.297	57.2944	93.5279	82.9393	27.1356		122.376		75.302
49	50.3273	77.0205	77.6141	90.3326		28.2572	76.4959	86.9032	85.3185	27.6523		105.856		74.8946
50	46.4697	79.4787	75.875	87.3015		23.9486	72.1538	95.2123	72.0602	23.9301		120.273		71.8634
51	49.3806	56.6163	79.2477	80.5808		23.9486	72.1356	73.6828	74.4134	23.0387		111.647		67.886
52	50.836	53.1283	73.7873	81.3735		23.9486	76.233	82.6203	69.3329	22.2604		116.419		62.4949
53	45.7904	59.2576	74.853	77.858		23.9486	61.7935	79.8882	70.3422	22.361		95.3386		60.8451
54	49.8518	42.9824	74.8436	73.5293		23.9486	56.2498	55.4988	66.1209	17.638		95.4503		56.2779
55	44.1717	52.5467	69.8911	74.2041		23.9486	45.2468	26.85	70.0977	17.8105		100.192		51.2794
56	43.3652	47.8322	65.6981	78.4588		23.9486	46.167	33.1197	70.1232	16.777		102.285		47.4092
57	48.285	48.1906	62.1581	75.0892		23.9486	49.0265	44.9188	74.5614	20.4499		101.535		42.5118
58	48.5814	47.8111	59.6605	80.696		23.9486	65.752	45.7785	70.4702	19.5119		86.0649		38.7676
59	44.5374	42.297	55.327	77.7254		23.9486	46.576	46.2848	69.8748	16.5681		100.021		36.8126
60	48.3559	28.2572	54.8578	74.6869		23.9486	46.8427	28.6422	66.597	14.312		75.5735		35.2412
61	49.4918	23.9486	52.797	73.4897		23.9486	51.0898	21.0591	67.3572	15.1695		73.9961		33.2128
62	45.7962	--	50.0134	72.3814		--	31.7568	23.4394	67.4383	15.1236		87.2066		32.5127
63	42.115	--	44.6135	76.0788		--	50.7756	15.1771	64.0008	12.6917		56.4901		32.2173
64	40.1277	--	41.4452	68.9558		--	59.8287	31.1028	68.2854	12.7472		54.4538		30.9258
65	37.3237	--	42.8232	80.4499		--	53.365	19.2167	76.0146	15.0424		50.9173		32.1549
66	39.8126	--	43.7627	81.5743		--	62.2681	8.33589	69.2762	14.4331		54.8376		33.0842
67	39.7042	--	47.2685	68.5743		--	32.8524	19.6487	68.1211	14.918		55.5669		33.5406
68	37.4076	--	48.8109	78.6663		--	53.8979	14.6081	72.6908	14.2004		34.5133		34.4377
69	34.5936	--	46.9631	83.7277		--	43.7713	12.5076	73.5369	14.2802		40.3255		33.9442
70	32.8722	--	47.9413	76.8783		--	50.5784	26.2166	70.0702	13.8576		41.7044		35.4983
71	36.4104	--	43.8028	78.0621		--	41.0982	25.8239	67.7399	13.2544		40.7689		33.6972
72	39.4499	--	49.2163	74.4821		--	41.7191	26.7397	69.5773	12.4807		27.8507
73	38.295	--	46.9493	75.0025		--	55.8444	26.6169	70.5524	16.7655		20.4942
74	37.8918	--	47.5908	79.7461		--	55.6984	19.7974	76.5861	11.5704		20.941
75	37.8672	--	50.3388	81.3803		--	44.2534	28.2286	67.8185	10.3295		22.2095
76	31.4038	--	50.9148	74.7613		--	46.9449	17.3569	62.8451	8.23772		18.6278
77	31.8345	--	51.5389	69.7279		--	41.1018	20.3488	64.1564	8.20527		22.3154
78	35.374	--	51.1316	73.7777		--	29.9125	13.3932	62.3828	7.6115		16.8915
79	33.9967	--	49.0988	63.0312		--	52.7696	9.3644	63.0527	7.30988		11.0849
80	35.0257	--	49.3118	72.1364		--	42.822		64.2554	6.66538		9.34975
81	46.4823		55.4866	66.2271		--	33.2795		61.673	6.967		9.98295
82	57.0417		56.6561	66.7579			38.0745		58.6196	7.85563		9.80315
83	50.5954		56.1315	63.7854			54.9242		63.8278	9.11554		8.04701
84	47.5283		59.6635	69.6891			58.7733		63.9636	12.0898		5.54631
85	53.9682		58.6967	68.1748			30.0768		64.4131	17.6258		5.24076
86	47.9717		--	71.9099			44.7611		65.556	18.7383		6.48063
87	46.5167			67.7194			48.6685		68.3231	20.6535		4.79732
88	49.2696			72.8455			39.5571		59.358	20.1666		6.18279
89	50.7117			66.7403			73.4903		66.7939	23.2876		8.53126
90	50.7052			74.7393					71.7668	28.4131		--
									71.3178	32.84		--
									89.2551	32.8468		--
										32.3077		--
										33.7848		--
										37.1013		--
										40.2026		--
										39.7008		--
										41.8547		--
										38.6614		--
										40.4684		--

## Sheet: Sheet2
	LTP					BASELINE
		1	89.7938	3.56852			1	92.4517	4.53941
		2	101.52	2.13406			2	100.869	2.14679
		3	108.686	2.88045			3	106.679	3.7513
		4	0	0			4	0	0
		5	0	0			5	0	0
		6	177.052	20.7404			6	92.7476	9.40715
		7	183.398	24.2078			7	87.2672	6.32394
		8	197.085	24.6979			8	87.5074	4.93359
		9	224.109	30.3545			9	89.481	5.24441
		10	244.928	40.5292			10	93.4859	7.41211
		11	245.021	41.0232			11	91.2381	4.91295
		12	284.332	59.7473			12	92.5991	3.62555
		13	278.256	53.5256			13	92.2675	4.53218
		14	279.695	50.7392			14	96.4312	4.2292
		15	278.838	41.6571			15	96.1303	4.33019
		16	288.069	45.1134			16	93.2056	2.98038
		17	272.256	39.6049			17	100.496	3.28937
		18	282.448	47.0432			18	96.4559	2.91738
		19	280.899	41.0445			19	97.7531	3.68154
		20	285.148	48.3614			20	93.1181	4.71702
		21	282.156	54.3604			21	94.9714	2.59769
		22	276.979	51.2148			22	91.3341	3.44861
		23	275.486	49.1378			23	91.8597	2.09492
		24	273.855	46.0423			24	95.0375	3.8252
		25	281.566	54.2435			25	98.7851	5.24084
		26	285.871	54.4249			26	97.2746	4.38485
		27	281.545	48.1298			27	102.471	8.25041
		28	267.978	41.7954			28	96.3164	6.50412
		29	257.272	37.4171			29	94.3297	5.54948
		30	246.387	34.5571			30	95.0642	4.95308
		31	230.538	29.3755			31	93.4979	5.92157
		32	222.05	26.0739			32	90.2649	4.98796
		33	225.022	28.1855			33	92.2732	8.14849
		34	226.192	31.4286			34	87.9122	5.27163
		35	209.337	26.9948			35	91.3741	5.70201
		36	194.569	28.6339			36	91.1059	6.89349
		37	185.067	28.1445			37	88.2623	7.16335
		38	185.116	30.9977			38	85.7379	8.00796
		39	175.809	26.6677			39	83.3081	7.27488
		40	167.055	29.9447			40	78.0535	7.15755
		41	161.821	25.4075			41	80.1855	6.73507
		42	147.759	24.4423			42	75.2232	7.0525
		43	141.33	26.0298			43	77.1251	7.70434
		44	138.38	26.2395			44	77.7283	8.76783
		45	136.324	27.1899			45	76.5182	7.18164
		46	123.509	23.5192			46	78.2764	9.00739
		47	119.201	24.0545			47	75.8068	7.48526
		48	117.897	25.724			48	73.1575	8.27614
		49	120.423	26.9471			49	70.9702	7.57107
		50	117.201	27.5875			50	69.8697	8.73642
		51	111.487	25.0695			51	64.7798	7.74868
		52	111.998	27.5635			52	64.7668	8.14851
		53	107.732	25.299			53	61.116	6.87546
		54	99.6247	25.6954			54	55.6719	6.75986
		55	99.0607	23.6529			55	52.3853	7.48181
		56	96.229	23.2009			56	52.2894	7.55274
		57	83.4949	20.0136			57	53.6977	7.08836
		58	82.6373	18.4846			58	53.3675	6.49311
		59	78.5422	17.4166			59	50.9066	7.24265
		60	76.3525	17.1931			60	45.2105	6.34026
		61	72.2321	15.2969			61	44.1418	6.57165
		62	61.4898	11.6497			62	47.2965	8.08093
		63	59.3048	11.0626			63	43.7955	7.05568
		64	56.4657	11.4749			64	45.3191	6.33802
		65	60.6151	13.0079			65	45.2564	7.55893
		66	57.4268	12.8883			66	45.265	8.13973
		67	58.2753	13.3776			67	42.2438	6.44777
		68	58.6195	12.7346			68	43.2481	7.56246
		69	53.782	11.7745			69	42.6278	7.92389
		70	49.036	11.9107			70	43.9575	6.71402
		71	64.8964	12.7534			71	42.2953	6.62064
		72	54.6583	15.3068			72	42.6895	7.52961
		73	54.4593	14.2234			73	43.815	7.84203
		74	50.5136	13.5908			74	43.7278	9.15664
		75	54.0792	15.1024			75	42.8032	8.33267
		76	59.2052	15.6179			76	38.8865	8.38782
		77	60.159	18.3389			77	38.6536	7.75015
		78	56.6994	17.6795			78	36.3094	8.52618
		79	58.694	14.6727			79	36.2135	8.5276
		80	57.4173	19.1104			80	39.9381	9.50074
		81	65.1058	21.382			81	40.0141	9.0984
		82	62.6396	20.5925			82	42.1155	9.19111
		83	60.334	23.4095			83	43.7753	9.26309
		84	66.8868	23.8285			84	45.322	9.78243
		85	68.3941	21.114			85	42.5994	9.37889
		86	0	0			86	42.5696	10.4778
							87	42.7797	10.4169
							88	41.2299	10.112
							89	48.2592	10.8468
							90	56.4061	10.7555
