# Supplementary figures and images for: Synaptic memory requires CaMKII
Source: eLife journal article supplement (doi:10.7554/elife.60360), 2021-12-15

Fig. S1

## WT vs Various Peptides AMPA/NMDA Ratio

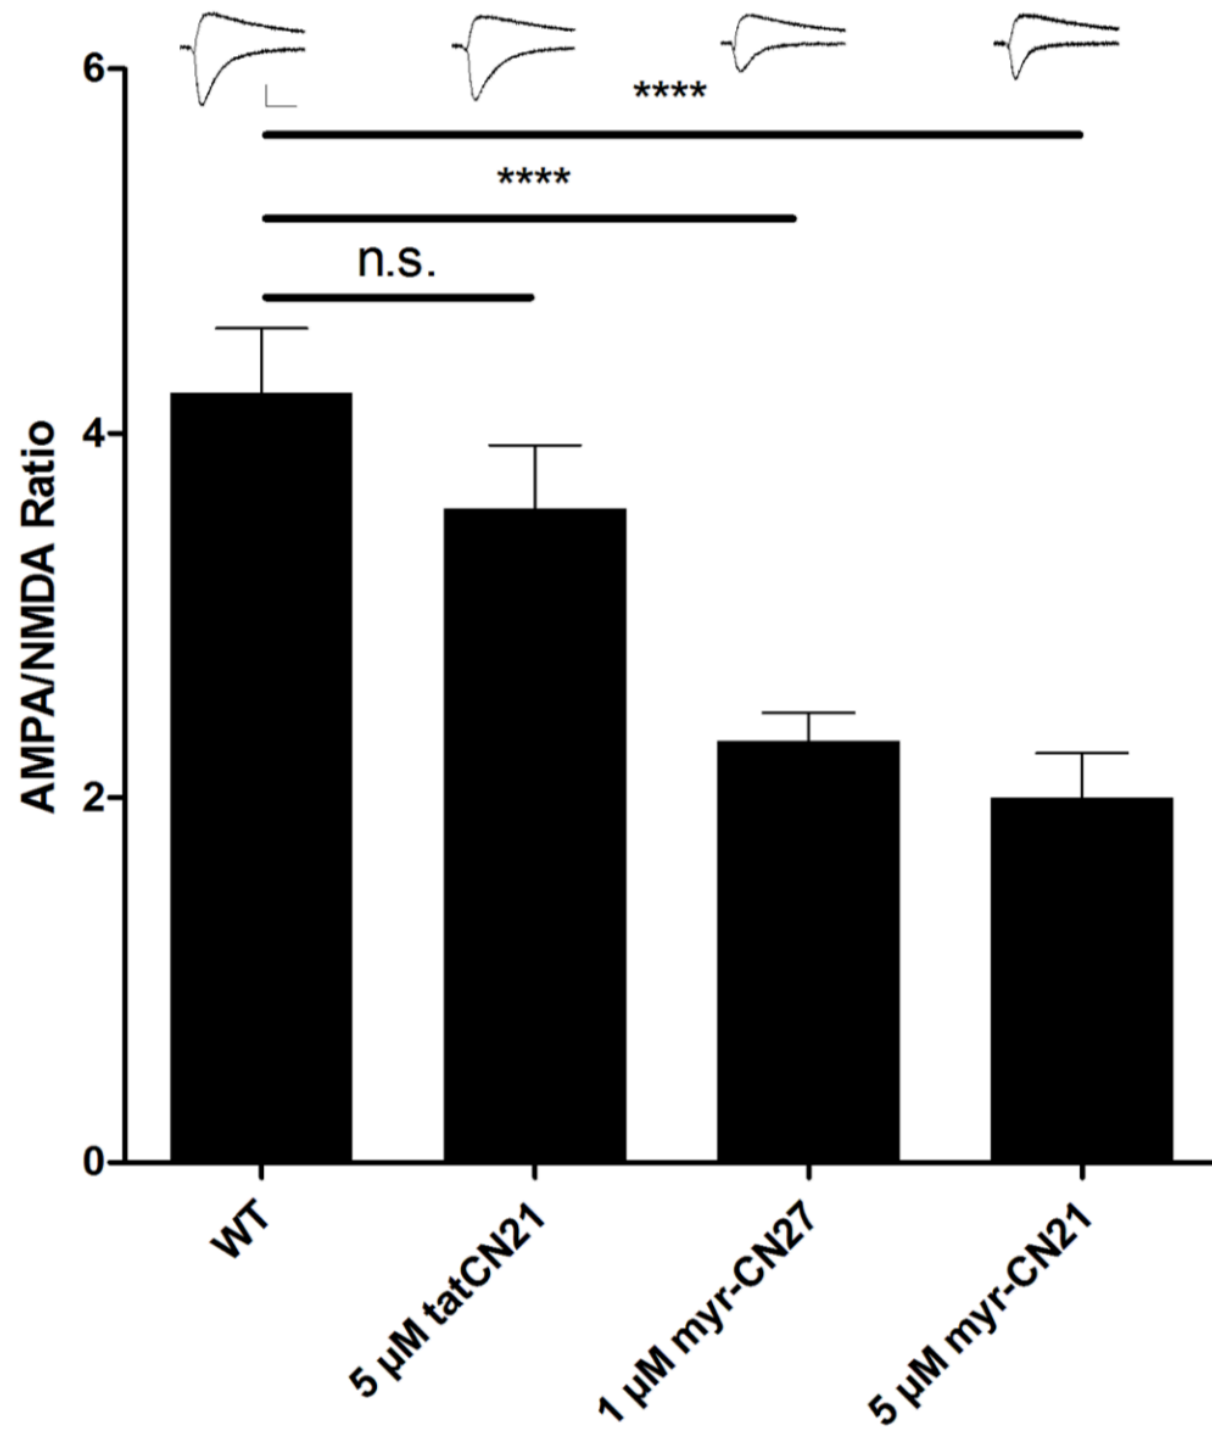

Supplement: supp [file elife_poa_e60360_Figure_1_figure_supplement1.pdf › elife_poa_e60360_Figure_1_figure_supplement1.pdf]

Fig. S2

Before light

A

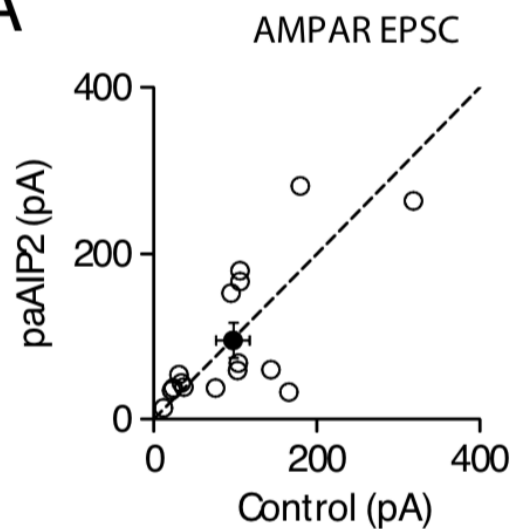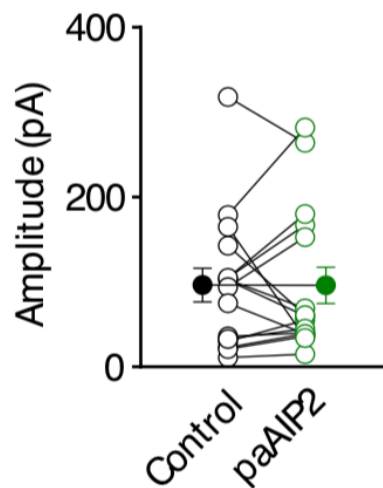

B

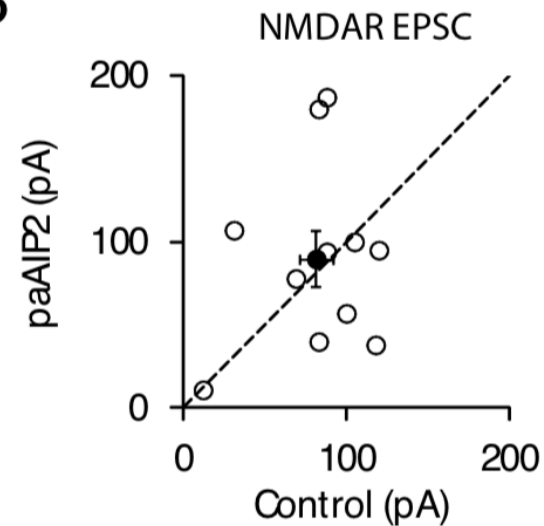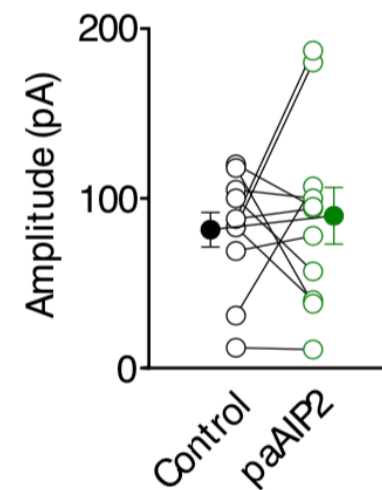

After light

C

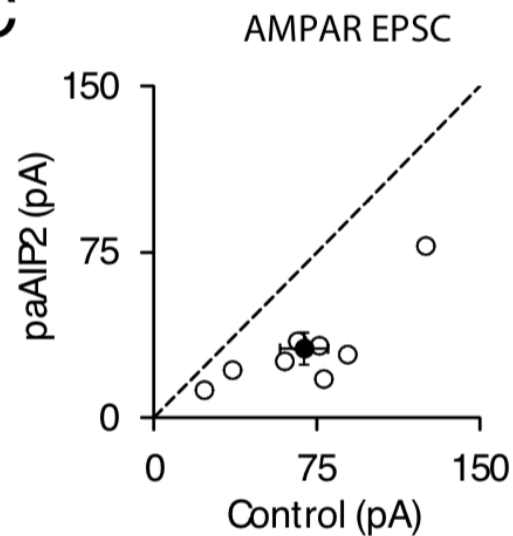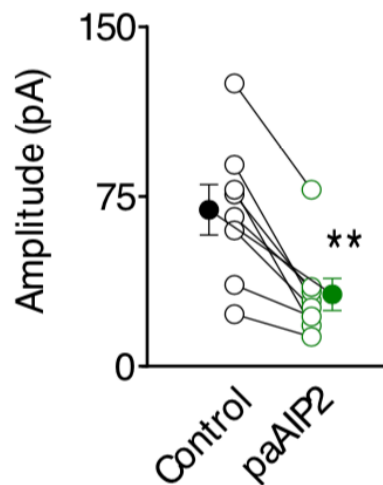

D

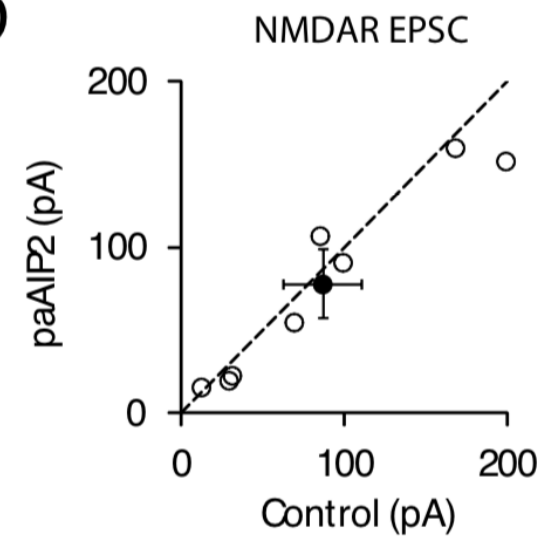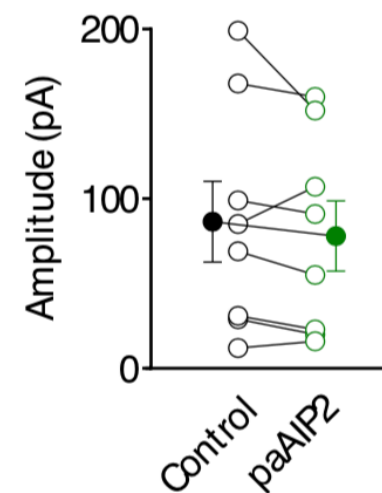

Supplement: supp [file elife_poa_e60360_Figure_3_figure_supplement1.pdf › elife_poa_e60360_Figure_3_figure_supplement1.pdf]

Fig. S3

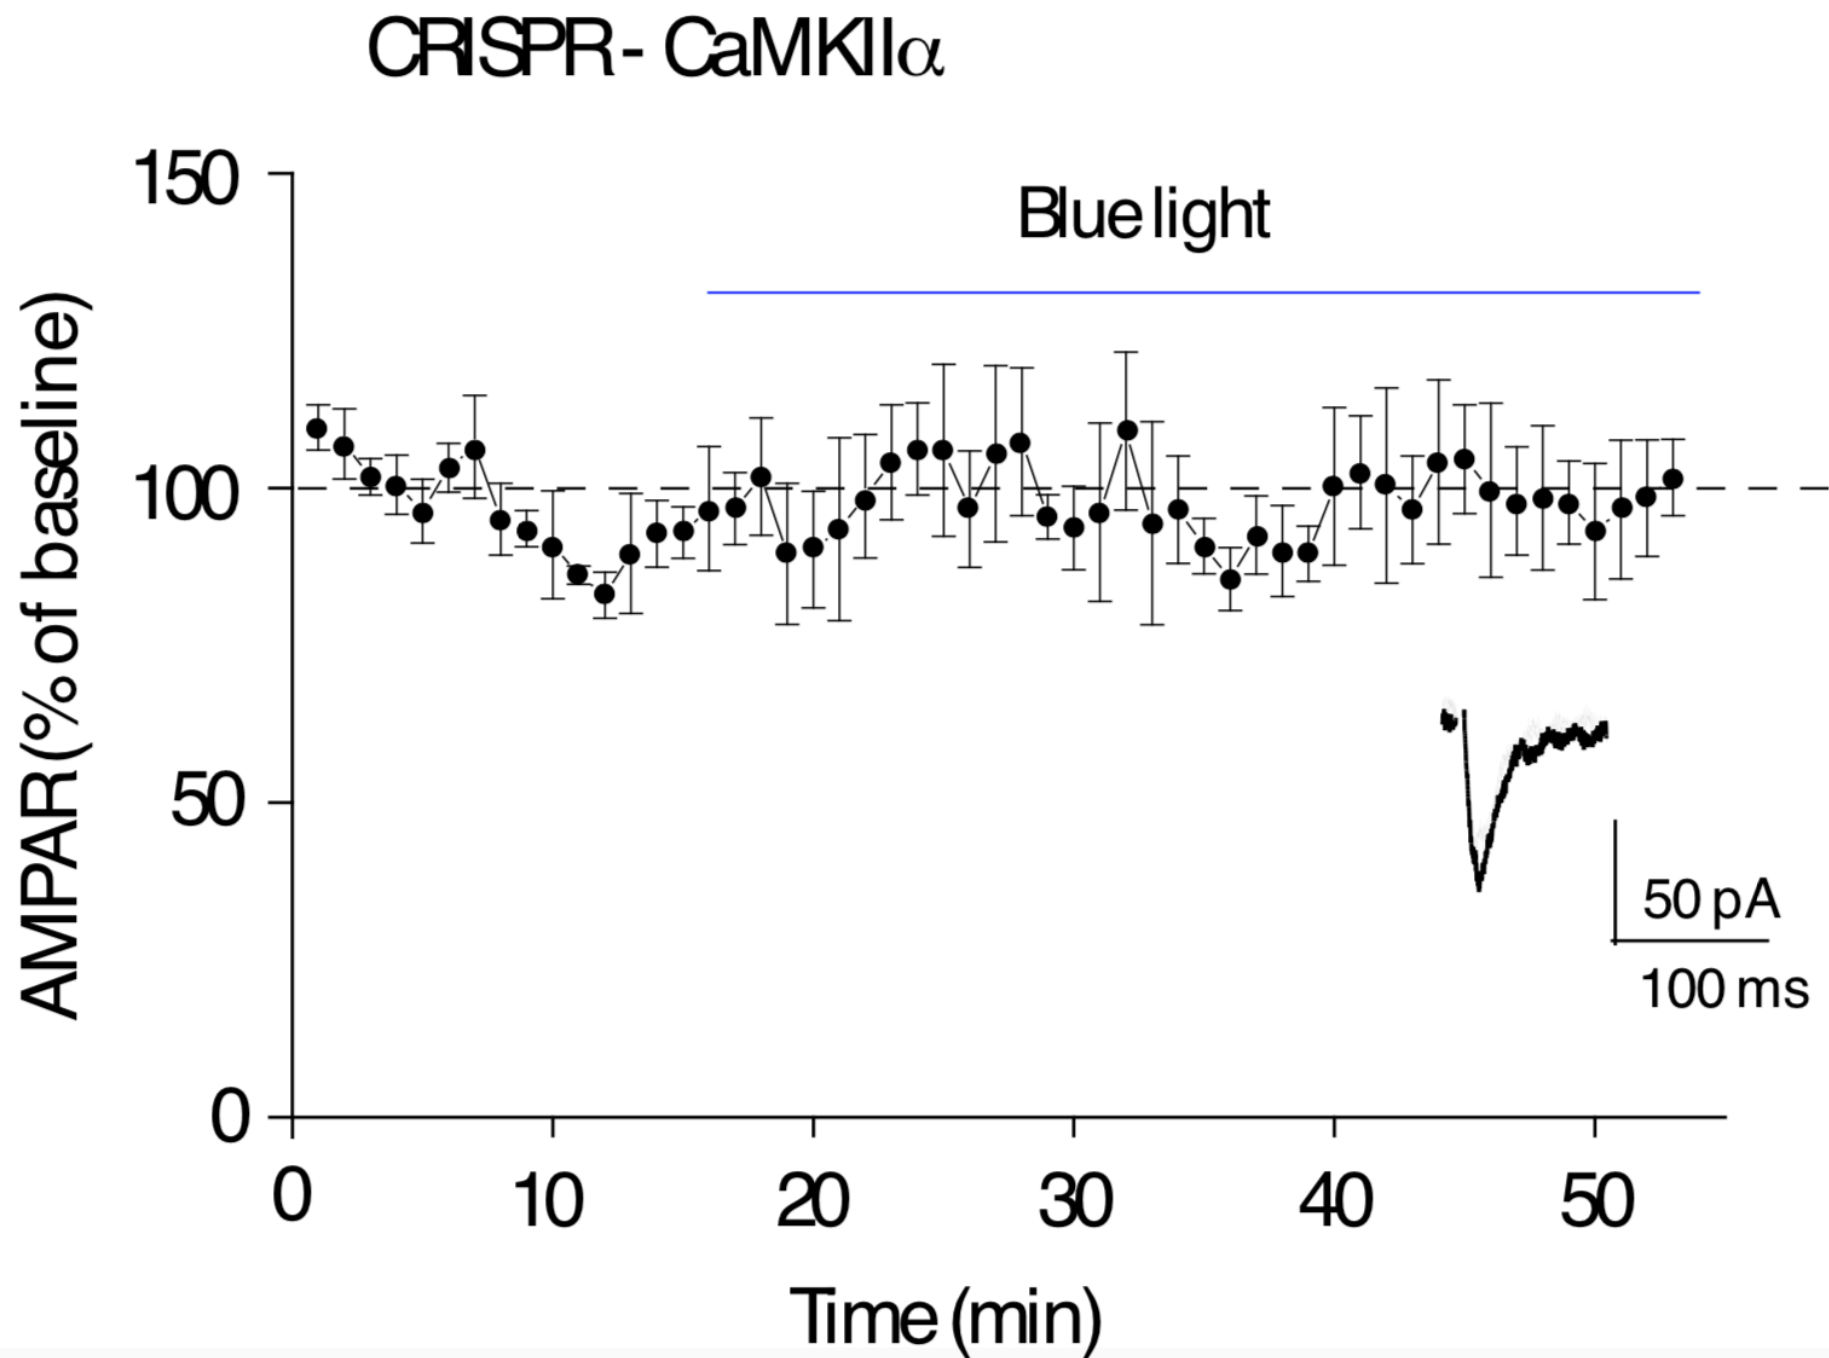

Supplement: supp [file elife_poa_e60360_Figure_3_figure_supplement2.pdf › elife_poa_e60360_Figure_3_figure_supplement2.pdf]

Fig. S4

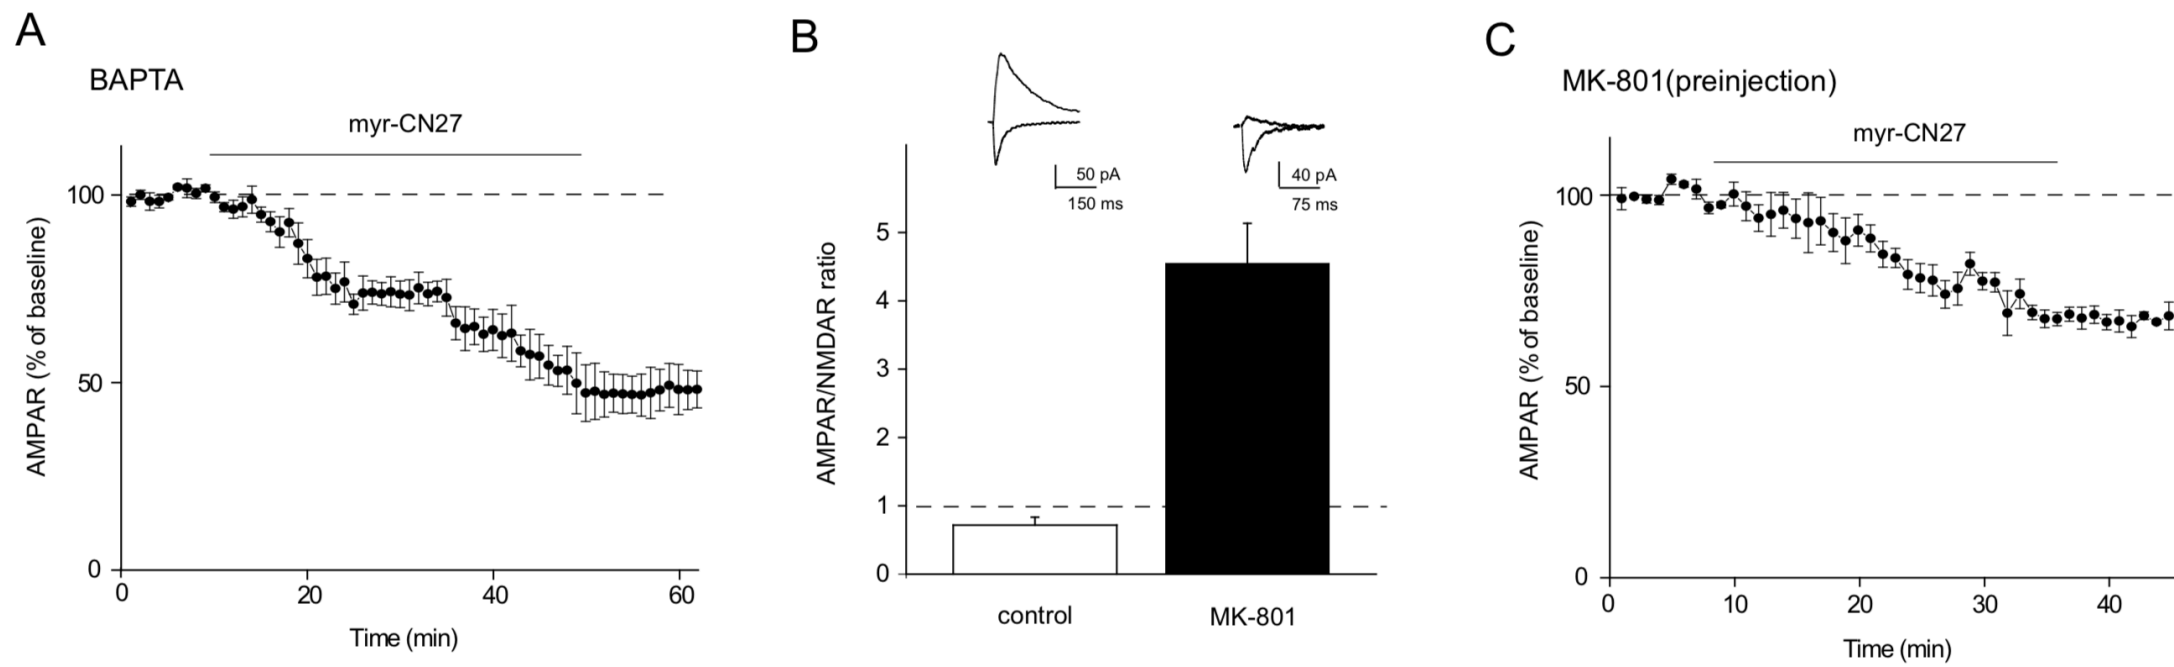

Supplement: supp [file elife_poa_e60360_Figure_4_figure_supplement1.pdf › elife_poa_e60360_Figure_4_figure_supplement1.pdf]

Fig. S5

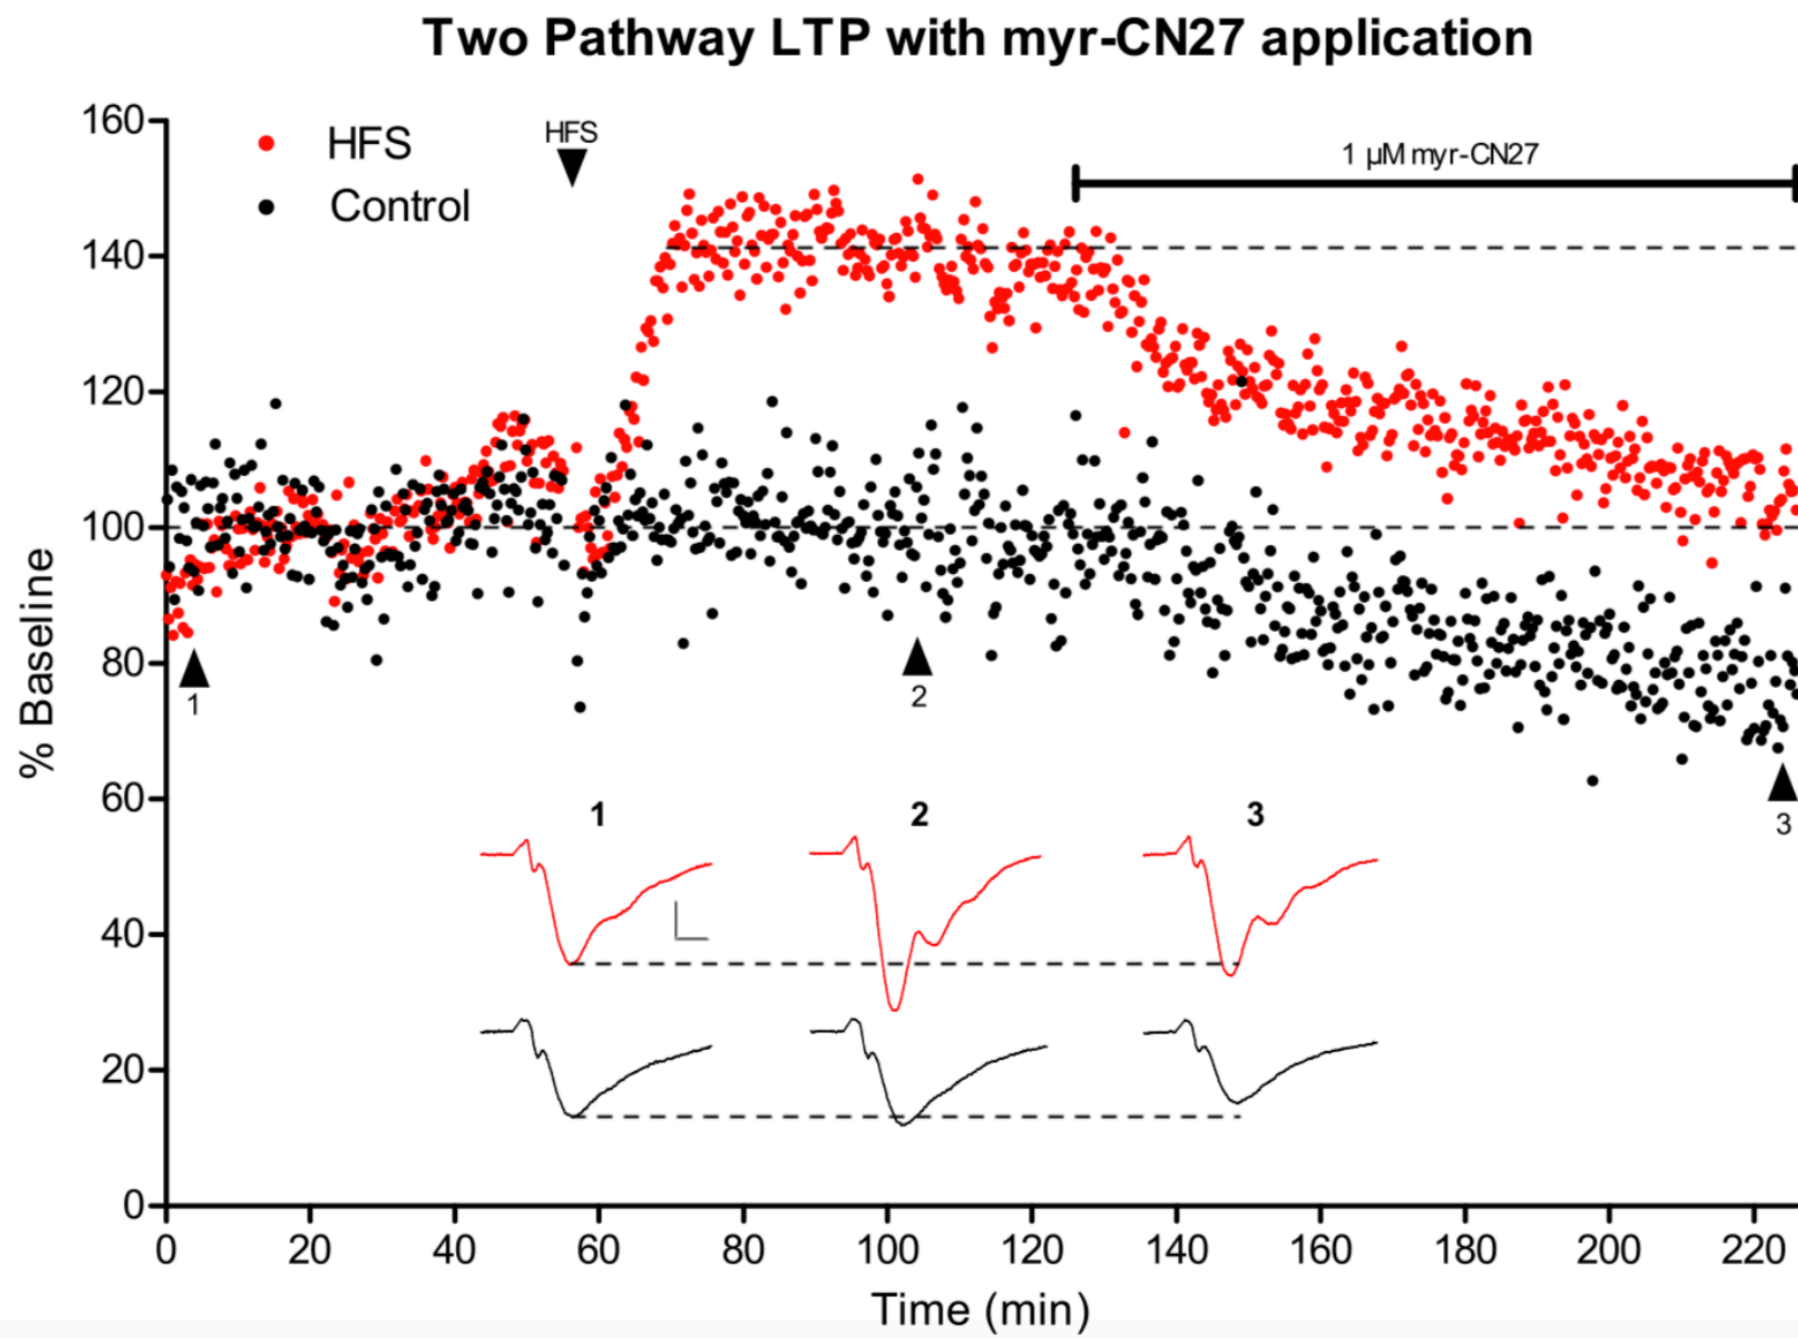

Supplement: supp [file elife_poa_e60360_Figure_6_figure_supplement1.pdf › elife_poa_e60360_Figure_6_figure_supplement1.pdf]
